# Supplementary material for: A machine-learning approach for accurate detection of copy number variants from exome sequencing
Source: HighWire-hosted journal article supplement (doi:10.1101/gr.245928.118), 2019-06-06
Supplement: Supplemental_Table_4.xlsx [file Supplemental_Table_4.xlsx]

## Sheet: README
Supplemental Table 4: 7302 validated CNVs obtained after merging the overlaps among the 10,235 CNVs reported by three independent sources in the 90 samples from the 1000 Genomes Project
	Column name	Example	Description
1	CHR	1	Chromosome Number
2	START	25589146	Start position of the CNV
3	END	25662212	End position of the CNV
4	TYPE	DEL	CNV Type
5	SAMPLE	NA06985	Sample Name
6	PRED_SIZE	73066	Size of the CNV
7	CNV_FREQ	37	Frequency within the 90 samples analyzed

## Sheet: Sheet1
CHR	START	END	TYPE	SAMPLE	PRED_SIZE	CNV_FREQ
1	25589146	25662212	DEL	NA06985	73066	37
1	61547702	61549738	DEL	NA06985	2036	1
1	110224384	110242953	DEL	NA06985	18569	89
1	149622963	149801822	DEL	NA06985	178859	17
1	152555176	152590091	DEL	NA06985	34915	62
1	154474148	154475093	DEL	NA06985	945	1
1	181057682	181059314	DEL	NA06985	1632	1
1	211751180	211753141	DEL	NA06985	1961	2
1	248739516	248797213	DEL	NA06985	57697	34
10	92617266	92618168	DEL	NA06985	902	90
11	5784859	5809477	DEL	NA06985	24618	34
11	55364677	55453061	DEL	NA06985	88384	38
12	111856140	111856590	DEL	NA06985	450	1
12	120801254	120809932	DEL	NA06985	8678	1
13	73632682	73634039	DEL	NA06985	1357	1
13	110433668	110440305	DEL	NA06985	6637	1
13	110959300	110961245	DEL	NA06985	1945	1
13	111565996	111568215	DEL	NA06985	2219	1
13	113760520	113765278	DEL	NA06985	4758	2
14	36986331	36990958	DEL	NA06985	4627	1
14	100704501	100707023	DEL	NA06985	2522	1
14	105633519	105635789	DEL	NA06985	2270	1
15	99190120	99193816	DEL	NA06985	3696	85
16	80997245	81028812	DEL	NA06985	31567	1
17	18355392	18465221	DEL	NA06985	109829	45
17	27068965	27071573	DEL	NA06985	2608	1
19	1465058	1470715	DEL	NA06985	5657	1
19	18390503	18393159	DEL	NA06985	2656	1
19	52692555	52696215	DEL	NA06985	3660	87
20	57465451	57467183	DEL	NA06985	1732	1
22	24283016	24340785	DEL	NA06985	57769	89
22	24344422	24396814	DEL	NA06985	52392	69
22	39355807	39392500	DEL	NA06985	36693	19
3	71802175	71804230	DEL	NA06985	2055	1
3	97887491	97919363	DEL	NA06985	31872	78
3	178550206	178568168	DEL	NA06985	17962	41
4	70127644	70239100	DEL	NA06985	111456	26
5	3594547	3596541	DEL	NA06985	1994	1
5	7396023	7396945	DEL	NA06985	922	1
5	43556383	43557492	DEL	NA06985	1109	1
5	147553094	147555199	DEL	NA06985	2105	71
5	180374610	180432609	DEL	NA06985	57999	39
6	29837192	29921127	DEL	NA06985	83935	84
7	5569108	5570673	DEL	NA06985	1565	1
7	66621964	66676630	DEL	NA06985	54666	36
7	157338367	157350840	DEL	NA06985	12473	46
1	1567881	1683706	DUP	NA06985	115825	79
1	17195155	17267496	DUP	NA06985	72341	68
1	25585225	25665195	DUP	NA06985	79970	81
1	110215012	110244931	DUP	NA06985	29919	43
1	120755686	120936665	DUP	NA06985	180979	82
1	161409063	161646758	DUP	NA06985	237695	86
10	26345494	26361303	DUP	NA06985	15809	68
10	33189319	33190528	DUP	NA06985	1209	70
10	46478317	47429141	DUP	NA06985	950824	86
10	47746303	47792421	DUP	NA06985	46118	83
10	48105747	48280150	DUP	NA06985	174403	79
10	89149588	89275944	DUP	NA06985	126356	86
11	18949072	18961988	DUP	NA06985	12916	48
11	55028247	55038507	DUP	NA06985	10260	78
12	10566089	10603748	DUP	NA06985	37659	85
14	20177210	20424753	DUP	NA06985	247543	59
15	22302006	22588022	DUP	NA06985	286016	62
15	30490438	30794939	DUP	NA06985	304501	85
15	32444256	32681359	DUP	NA06985	237103	80
15	34662754	34875351	DUP	NA06985	212597	86
16	222083	227514	DUP	NA06985	5431	84
16	2649818	2736115	DUP	NA06985	86297	87
16	14989863	15108587	DUP	NA06985	118724	77
16	21733697	21809459	DUP	NA06985	75762	82
16	55842382	55862710	DUP	NA06985	20328	28
16	70847248	71202529	DUP	NA06985	355281	85
16	74396294	74452036	DUP	NA06985	55742	49
17	39532301	39539624	DUP	NA06985	7323	87
17	44165801	44364214	DUP	NA06985	198413	25
17	44401067	44752300	DUP	NA06985	351233	59
19	41350994	41380946	DUP	NA06985	29952	21
19	43308866	43547145	DUP	NA06985	238279	85
19	53322989	53361358	DUP	NA06985	38369	82
19	54723919	54749032	DUP	NA06985	25113	84
20	1556955	1561014	DUP	NA06985	4059	88
21	10736871	10943554	DUP	NA06985	206683	82
22	24274694	24393721	DUP	NA06985	119027	61
22	25663985	25918712	DUP	NA06985	254727	14
22	42879201	43005214	DUP	NA06985	126013	57
4	76948569	76977780	DUP	NA06985	29211	41
5	69283618	69338235	DUP	NA06985	54617	76
6	255650	384973	DUP	NA06985	129323	82
6	29653954	29928841	DUP	NA06985	274887	84
6	31958876	31985522	DUP	NA06985	26646	81
6	32592985	32614037	DUP	NA06985	21052	43
6	62178788	62919415	DUP	NA06985	740627	67
6	168335276	168595915	DUP	NA06985	260639	3
7	126514673	126552956	DUP	NA06985	38283	78
7	143218968	143568059	DUP	NA06985	349091	86
7	151901841	151908834	DUP	NA06985	6993	80
8	7342641	7355399	DUP	NA06985	12758	76
1	12909237	12927107	DEL	NA06994	17870	20
1	25589146	25662212	DEL	NA06994	73066	37
1	89476419	89478526	DEL	NA06994	2107	29
1	110224384	110242953	DEL	NA06994	18569	89
1	116135317	116677627	DEL	NA06994	542310	46
1	149622963	149801822	DEL	NA06994	178859	17
1	196723047	196815791	DEL	NA06994	92744	41
11	4966925	4977889	DEL	NA06994	10964	58
11	55364677	55453061	DEL	NA06994	88384	38
14	20200183	20423865	DEL	NA06994	223682	82
14	73998976	74028117	DEL	NA06994	29141	66
17	18355392	18465221	DEL	NA06994	109829	45
19	35849493	35861848	DEL	NA06994	12355	31
19	51509454	51511116	DEL	NA06994	1662	2
19	52131804	52150223	DEL	NA06994	18419	81
19	52692555	52696215	DEL	NA06994	3660	87
22	22381019	23248950	DEL	NA06994	867931	8
22	24283016	24340785	DEL	NA06994	57769	89
22	24344422	24396814	DEL	NA06994	52392	69
3	97887491	97919363	DEL	NA06994	31872	78
4	69360488	69542499	DEL	NA06994	182011	49
5	147553094	147555199	DEL	NA06994	2105	71
5	177157399	177198449	DEL	NA06994	41050	68
5	180374610	180433980	DEL	NA06994	59370	39
6	29837192	29921127	DEL	NA06994	83935	84
6	32431552	32573771	DEL	NA06994	142219	83
6	32609298	32632000	DEL	NA06994	22702	72
7	157338367	157350840	DEL	NA06994	12473	46
1	1567881	1683706	DUP	NA06994	115825	79
1	25585225	25665195	DUP	NA06994	79970	81
1	110186846	110259108	DUP	NA06994	72262	51
1	120755686	120936665	DUP	NA06994	180979	82
1	161409063	161646758	DUP	NA06994	237695	86
1	234744318	234747260	DUP	NA06994	2942	83
10	26345494	26361303	DUP	NA06994	15809	68
10	33189319	33190528	DUP	NA06994	1209	70
10	46478317	47429141	DUP	NA06994	950824	86
10	47746303	47792421	DUP	NA06994	46118	83
10	48105747	48280150	DUP	NA06994	174403	79
10	89149588	89275944	DUP	NA06994	126356	86
10	92617266	92618168	DUP	NA06994	902	90
11	18949072	18961988	DUP	NA06994	12916	48
11	55028247	55038507	DUP	NA06994	10260	78
12	10566089	10603748	DUP	NA06994	37659	85
12	124496106	124499990	DUP	NA06994	3884	11
14	73994388	74051967	DUP	NA06994	57579	52
14	93712512	93713151	DUP	NA06994	639	42
15	22302006	22588022	DUP	NA06994	286016	62
15	30440575	30794939	DUP	NA06994	354364	84
15	32444256	32681359	DUP	NA06994	237103	80
15	34660520	34875351	DUP	NA06994	214831	83
15	43892841	43894806	DUP	NA06994	1965	7
15	99190120	99193816	DUP	NA06994	3696	85
16	222083	227514	DUP	NA06994	5431	84
16	2649818	2736115	DUP	NA06994	86297	87
16	14989863	15108587	DUP	NA06994	118724	77
16	21733697	21809459	DUP	NA06994	75762	82
16	28679547	28763122	DUP	NA06994	83575	84
16	70847248	71202529	DUP	NA06994	355281	85
16	74396294	74452036	DUP	NA06994	55742	49
17	39532301	39539624	DUP	NA06994	7323	87
17	44165801	44364214	DUP	NA06994	198413	25
19	41337301	41393256	DUP	NA06994	55955	68
19	43308866	43547145	DUP	NA06994	238279	85
19	53322989	53361358	DUP	NA06994	38369	82
19	54723919	54749032	DUP	NA06994	25113	84
2	38955862	38972830	DUP	NA06994	16968	5
2	179296203	179296985	DUP	NA06994	782	36
20	1552338	1596222	DUP	NA06994	43884	51
20	56283924	56285426	DUP	NA06994	1502	82
21	10736871	10943554	DUP	NA06994	206683	82
22	24274694	24393721	DUP	NA06994	119027	61
22	42879201	43005214	DUP	NA06994	126013	87
4	76948569	76977780	DUP	NA06994	29211	41
5	69283618	69338235	DUP	NA06994	54617	76
6	255650	384973	DUP	NA06994	129323	86
6	29653954	29928841	DUP	NA06994	274887	84
6	31958876	31985522	DUP	NA06994	26646	81
6	62178788	62919415	DUP	NA06994	740627	67
7	126514673	126552956	DUP	NA06994	38283	78
7	143218968	143568059	DUP	NA06994	349091	86
7	151901841	151908834	DUP	NA06994	6993	80
8	7342641	7355399	DUP	NA06994	12758	76
1	89476419	89478526	DEL	NA07000	2107	29
1	108733355	108737496	DEL	NA07000	4141	36
1	152555176	152590091	DEL	NA07000	34915	62
1	152760089	152771114	DEL	NA07000	11025	32
1	169059628	169621268	DEL	NA07000	561640	25
1	248729106	248797213	DEL	NA07000	68107	34
11	4966925	4977889	DEL	NA07000	10964	58
11	18949072	18961988	DEL	NA07000	12916	48
11	48327672	48328178	DEL	NA07000	506	7
14	20200183	20423865	DEL	NA07000	223682	82
14	73998976	74028117	DEL	NA07000	29141	66
17	15542699	15546790	DEL	NA07000	4091	21
17	18355392	18465221	DEL	NA07000	109829	45
17	44401067	44752300	DEL	NA07000	351233	59
19	52692555	52696215	DEL	NA07000	3660	87
22	24283016	24340785	DEL	NA07000	57769	89
22	24344422	24396814	DEL	NA07000	52392	69
22	25619034	25928990	DEL	NA07000	309956	13
3	97887491	97919363	DEL	NA07000	31872	78
5	42628248	42631270	DEL	NA07000	3022	44
5	147553094	147555199	DEL	NA07000	2105	71
5	180374610	180433980	DEL	NA07000	59370	39
6	29837192	29921127	DEL	NA07000	83935	84
6	32431552	32573771	DEL	NA07000	142219	83
6	32592985	32632000	DEL	NA07000	39015	57
7	66621964	66676630	DEL	NA07000	54666	36
9	91963403	92343382	DEL	NA07000	379979	15
1	1567881	1683706	DUP	NA07000	115825	79
1	17209603	17267496	DUP	NA07000	57893	66
1	25585225	25665195	DUP	NA07000	79970	81
1	110186846	110259108	DUP	NA07000	72262	64
1	120755686	120936665	DUP	NA07000	180979	82
1	161409063	161646758	DUP	NA07000	237695	86
1	234744318	234747260	DUP	NA07000	2942	83
10	33189319	33190528	DUP	NA07000	1209	70
10	46478317	47429141	DUP	NA07000	950824	86
10	47746303	47792421	DUP	NA07000	46118	83
10	48105747	48280150	DUP	NA07000	174403	79
10	89149588	89275944	DUP	NA07000	126356	86
10	92617266	92618168	DUP	NA07000	902	90
11	55028247	55038507	DUP	NA07000	10260	78
12	10566089	10603748	DUP	NA07000	37659	85
12	71532675	71533665	DUP	NA07000	990	54
15	22302006	22588022	DUP	NA07000	286016	62
15	30440575	30794939	DUP	NA07000	354364	84
15	32444256	32681359	DUP	NA07000	237103	80
15	34660520	34875351	DUP	NA07000	214831	83
15	94886323	94888595	DUP	NA07000	2272	24
15	99190120	99193816	DUP	NA07000	3696	85
16	222083	227514	DUP	NA07000	5431	84
16	2649818	2741812	DUP	NA07000	91994	50
16	14989863	15108587	DUP	NA07000	118724	77
16	21733697	21809459	DUP	NA07000	75762	82
16	28679547	28763122	DUP	NA07000	83575	84
16	70847248	71202529	DUP	NA07000	355281	85
17	39532301	39539624	DUP	NA07000	7323	87
19	41337301	41393256	DUP	NA07000	55955	68
19	43308866	43547145	DUP	NA07000	238279	85
19	52131804	52150223	DUP	NA07000	18419	81
19	53322989	53361358	DUP	NA07000	38369	82
19	54723919	54749032	DUP	NA07000	25113	84
2	38955862	38972830	DUP	NA07000	16968	5
20	1552338	1596222	DUP	NA07000	43884	51
20	56283924	56285426	DUP	NA07000	1502	82
21	10736871	10943554	DUP	NA07000	206683	82
22	24274694	24393721	DUP	NA07000	119027	61
22	42879201	43005214	DUP	NA07000	126013	57
3	194384096	194400303	DUP	NA07000	16207	45
5	69283618	69338235	DUP	NA07000	54617	76
6	255650	384973	DUP	NA07000	129323	86
6	29653954	29928841	DUP	NA07000	274887	84
6	31280101	31341340	DUP	NA07000	61239	66
6	31958876	31985522	DUP	NA07000	26646	81
7	56087431	56089032	DUP	NA07000	1601	63
7	126514673	126552956	DUP	NA07000	38283	78
7	143218968	143568059	DUP	NA07000	349091	86
7	151901841	151908834	DUP	NA07000	6993	80
8	7342641	7355399	DUP	NA07000	12758	76
1	12845863	12883096	DEL	NA07056	37233	13
1	25589146	25662212	DEL	NA07056	73066	37
1	89476419	89478526	DEL	NA07056	2107	29
1	110224384	110242953	DEL	NA07056	18569	89
1	116135317	116677627	DEL	NA07056	542310	46
1	120526947	120697078	DEL	NA07056	170131	10
1	149622963	149801822	DEL	NA07056	178859	17
1	152555176	152590091	DEL	NA07056	34915	62
1	152760089	152771114	DEL	NA07056	11025	32
1	196723047	196815791	DEL	NA07056	92744	41
10	2688857	3134214	DEL	NA07056	445357	2
11	18949072	18961988	DEL	NA07056	12916	48
11	48327672	48328178	DEL	NA07056	506	7
12	53086387	53087927	DEL	NA07056	1540	6
14	20200183	20423865	DEL	NA07056	223682	82
14	73998976	74028117	DEL	NA07056	29141	66
19	52692555	52696215	DEL	NA07056	3660	87
22	24344422	24396814	DEL	NA07056	52392	69
4	69360488	69542499	DEL	NA07056	182011	49
5	42628248	42631270	DEL	NA07056	3022	44
5	140222149	140243756	DEL	NA07056	21607	9
5	147553094	147555199	DEL	NA07056	2105	71
5	177157399	177198449	DEL	NA07056	41050	68
6	29837192	29921127	DEL	NA07056	83935	84
6	31280101	31341340	DEL	NA07056	61239	66
6	32431552	32573771	DEL	NA07056	142219	83
6	32609298	32632000	DEL	NA07056	22702	72
1	1627918	1672603	DUP	NA07056	44685	13
1	25585225	25665195	DUP	NA07056	79970	81
1	110186846	110259108	DUP	NA07056	72262	60
1	120755686	120936665	DUP	NA07056	180979	82
1	161409063	161646758	DUP	NA07056	237695	86
1	234744318	234747260	DUP	NA07056	2942	83
10	26345494	26361303	DUP	NA07056	15809	68
10	33189319	33190528	DUP	NA07056	1209	70
10	46478317	47429141	DUP	NA07056	950824	45
10	47746303	47792421	DUP	NA07056	46118	83
10	89149588	89275944	DUP	NA07056	126356	86
10	92617266	92618168	DUP	NA07056	902	90
11	55028247	55038507	DUP	NA07056	10260	78
12	10566089	10603748	DUP	NA07056	37659	85
12	71532675	71533665	DUP	NA07056	990	54
14	73994388	74051967	DUP	NA07056	57579	52
14	93712512	93713151	DUP	NA07056	639	42
15	22302006	22588022	DUP	NA07056	286016	62
15	30440575	30794939	DUP	NA07056	354364	84
15	32444256	32681359	DUP	NA07056	237103	80
15	34660520	34875351	DUP	NA07056	214831	83
15	94886323	94888595	DUP	NA07056	2272	24
15	99190120	99193816	DUP	NA07056	3696	85
16	222083	227514	DUP	NA07056	5431	84
16	2649818	2736115	DUP	NA07056	86297	87
16	14989863	15108587	DUP	NA07056	118724	77
16	21733697	21809459	DUP	NA07056	75762	82
16	28679547	28763122	DUP	NA07056	83575	84
16	70847248	71202529	DUP	NA07056	355281	85
16	74396294	74452036	DUP	NA07056	55742	49
17	39532301	39539624	DUP	NA07056	7323	87
19	41337301	41393256	DUP	NA07056	55955	68
19	43308866	43547145	DUP	NA07056	238279	85
19	52131804	52150223	DUP	NA07056	18419	81
19	53322989	53361358	DUP	NA07056	38369	82
19	54723919	54749032	DUP	NA07056	25113	84
2	179296203	179296985	DUP	NA07056	782	36
20	1556955	1561014	DUP	NA07056	4059	88
20	56283924	56285426	DUP	NA07056	1502	82
22	42879201	43005214	DUP	NA07056	126013	87
4	76948569	76977780	DUP	NA07056	29211	41
5	69283618	69338235	DUP	NA07056	54617	76
6	255650	384973	DUP	NA07056	129323	82
6	29653954	29928841	DUP	NA07056	274887	84
6	31958876	31985522	DUP	NA07056	26646	81
6	62178788	62919415	DUP	NA07056	740627	67
7	126514673	126552956	DUP	NA07056	38283	78
7	143218968	143568059	DUP	NA07056	349091	86
7	151901841	151908834	DUP	NA07056	6993	80
8	7342641	7355399	DUP	NA07056	12758	76
1	25589146	25662212	DEL	NA07357	73066	37
1	108733355	108737496	DEL	NA07357	4141	36
1	110186846	110259108	DEL	NA07357	72262	74
1	116135317	116677627	DEL	NA07357	542310	46
1	120526947	120697078	DEL	NA07357	170131	10
1	149622963	149801822	DEL	NA07357	178859	17
1	152555176	152590091	DEL	NA07357	34915	62
1	152760089	152771114	DEL	NA07357	11025	32
1	248729106	248797213	DEL	NA07357	68107	34
10	96856006	96996043	DEL	NA07357	140037	24
11	54965608	55036472	DEL	NA07357	70864	26
11	55364677	55453061	DEL	NA07357	88384	38
14	20200183	20423865	DEL	NA07357	223682	82
14	73998976	74028117	DEL	NA07357	29141	66
19	52692555	52696215	DEL	NA07357	3660	87
22	22381019	23248950	DEL	NA07357	867931	7
22	24344422	24396814	DEL	NA07357	52392	69
3	97887491	97919363	DEL	NA07357	31872	78
3	186386577	186424582	DEL	NA07357	38005	4
5	42628248	42631270	DEL	NA07357	3022	44
5	147553094	147555199	DEL	NA07357	2105	71
5	180374610	180433980	DEL	NA07357	59370	39
6	29837192	29921127	DEL	NA07357	83935	84
6	31280101	31341340	DEL	NA07357	61239	66
6	32431552	32573771	DEL	NA07357	142219	83
6	32609298	32632000	DEL	NA07357	22702	72
7	157338367	157350840	DEL	NA07357	12473	46
1	1567881	1683706	DUP	NA07357	115825	79
1	25585225	25665195	DUP	NA07357	79970	81
1	120755686	120936665	DUP	NA07357	180979	82
1	161409063	161646758	DUP	NA07357	237695	86
1	234744318	234747260	DUP	NA07357	2942	83
10	26345494	26361303	DUP	NA07357	15809	68
10	33189319	33190528	DUP	NA07357	1209	70
10	46478317	47429141	DUP	NA07357	950824	86
10	47746303	47792421	DUP	NA07357	46118	83
10	48105747	48280150	DUP	NA07357	174403	79
10	89149588	89275944	DUP	NA07357	126356	86
10	92617266	92618168	DUP	NA07357	902	90
11	55028247	55038507	DUP	NA07357	10260	78
12	10566089	10603748	DUP	NA07357	37659	85
14	73994388	74051967	DUP	NA07357	57579	52
14	93712512	93713151	DUP	NA07357	639	42
15	30440575	30794939	DUP	NA07357	354364	84
15	32444256	32681359	DUP	NA07357	237103	80
15	34660520	34875351	DUP	NA07357	214831	83
15	94886323	94888595	DUP	NA07357	2272	24
15	99190120	99193816	DUP	NA07357	3696	85
16	222083	227514	DUP	NA07357	5431	84
16	2649818	2741812	DUP	NA07357	91994	50
16	14989863	15108587	DUP	NA07357	118724	77
16	21733697	21809459	DUP	NA07357	75762	82
16	28679547	28763122	DUP	NA07357	83575	84
16	70847248	71202529	DUP	NA07357	355281	85
16	74396294	74452036	DUP	NA07357	55742	49
17	39532301	39539624	DUP	NA07357	7323	87
19	41337301	41393256	DUP	NA07357	55955	68
19	43308866	43547145	DUP	NA07357	238279	85
19	45850705	45891924	DUP	NA07357	41219	2
19	52131804	52150223	DUP	NA07357	18419	81
19	53322989	53361358	DUP	NA07357	38369	82
19	54723919	54749032	DUP	NA07357	25113	84
2	179296203	179296985	DUP	NA07357	782	36
20	1556955	1561014	DUP	NA07357	4059	88
20	56283924	56285426	DUP	NA07357	1502	82
22	21725998	21845294	DUP	NA07357	119296	35
22	24283016	24340785	DUP	NA07357	57769	89
22	42879201	43005214	DUP	NA07357	126013	87
5	69283618	69338235	DUP	NA07357	54617	76
6	255650	384973	DUP	NA07357	129323	82
6	29653954	29928841	DUP	NA07357	274887	84
6	31958876	31985522	DUP	NA07357	26646	81
7	56087431	56089032	DUP	NA07357	1601	63
7	126514673	126552956	DUP	NA07357	38283	78
7	143218968	143568059	DUP	NA07357	349091	86
8	7342641	7355399	DUP	NA07357	12758	76
1	108733355	108737496	DEL	NA10847	4141	36
1	110224384	110242953	DEL	NA10847	18569	89
1	150601192	150602306	DEL	NA10847	1114	1
1	152555176	152590091	DEL	NA10847	34915	62
1	213002088	213013140	DEL	NA10847	11052	6
10	89148493	89276558	DEL	NA10847	128065	13
11	4966925	4977889	DEL	NA10847	10964	58
11	55364677	55453061	DEL	NA10847	88384	38
12	10583367	10596119	DEL	NA10847	12752	27
12	11504579	11568972	DEL	NA10847	64393	19
13	79175030	79176563	DEL	NA10847	1533	1
14	20200183	20423865	DEL	NA10847	223682	82
14	73998976	74028117	DEL	NA10847	29141	66
14	74550921	74553036	DEL	NA10847	2115	1
17	18355392	18465221	DEL	NA10847	109829	45
19	5904363	5904863	DEL	NA10847	500	2
19	11485189	11486204	DEL	NA10847	1015	1
19	35849254	35865601	DEL	NA10847	16347	27
19	52692555	52696215	DEL	NA10847	3660	87
19	54800397	54811362	DEL	NA10847	10965	37
22	24283016	24340785	DEL	NA10847	57769	89
22	24344422	24396814	DEL	NA10847	52392	69
22	39355807	39392500	DEL	NA10847	36693	19
3	97887491	97919363	DEL	NA10847	31872	78
5	147553094	147555199	DEL	NA10847	2105	71
5	177157399	177198449	DEL	NA10847	41050	68
5	180374610	180433980	DEL	NA10847	59370	39
6	29837192	29921127	DEL	NA10847	83935	84
6	31280101	31341340	DEL	NA10847	61239	66
6	32431552	32573771	DEL	NA10847	142219	83
6	169633222	169635277	DEL	NA10847	2055	3
7	157338367	157350840	DEL	NA10847	12473	46
1	1567881	1683706	DUP	NA10847	115825	79
1	12841928	12971833	DUP	NA10847	129905	14
1	13320047	13499446	DUP	NA10847	179399	1
1	17195155	17267496	DUP	NA10847	72341	68
1	25585225	25665195	DUP	NA10847	79970	81
1	110215012	110244931	DUP	NA10847	29919	43
1	120755686	120936665	DUP	NA10847	180979	82
1	161409063	161646758	DUP	NA10847	237695	86
1	234744318	234747260	DUP	NA10847	2942	83
10	26345494	26361303	DUP	NA10847	15809	68
10	33189319	33190528	DUP	NA10847	1209	70
10	46478317	47429141	DUP	NA10847	950824	86
10	47746303	47792421	DUP	NA10847	46118	83
10	48105747	48280150	DUP	NA10847	174403	79
10	89149588	89275944	DUP	NA10847	126356	86
10	92617266	92618168	DUP	NA10847	902	90
11	18949072	18961988	DUP	NA10847	12916	48
12	10566089	10603748	DUP	NA10847	37659	85
12	71532675	71533665	DUP	NA10847	990	54
12	124496106	124499990	DUP	NA10847	3884	11
14	65014784	65020415	DUP	NA10847	5631	3
15	22302006	22588022	DUP	NA10847	286016	62
15	30440575	30794939	DUP	NA10847	354364	84
15	32444256	32681359	DUP	NA10847	237103	80
15	34660520	34875351	DUP	NA10847	214831	83
15	94886323	94888595	DUP	NA10847	2272	24
15	99190120	99193816	DUP	NA10847	3696	85
16	222083	227514	DUP	NA10847	5431	84
16	2649818	2736115	DUP	NA10847	86297	87
16	14989863	15108587	DUP	NA10847	118724	77
16	21733697	21809459	DUP	NA10847	75762	82
16	28679547	28763122	DUP	NA10847	83575	84
16	70847248	71202529	DUP	NA10847	355281	85
16	74396294	74452036	DUP	NA10847	55742	49
17	39532301	39539624	DUP	NA10847	7323	87
17	44165801	44364214	DUP	NA10847	198413	25
19	41337301	41393256	DUP	NA10847	55955	68
19	43308866	43547145	DUP	NA10847	238279	85
19	52131804	52150223	DUP	NA10847	18419	81
19	53322989	53361358	DUP	NA10847	38369	82
19	54723919	54749032	DUP	NA10847	25113	84
20	1552338	1596222	DUP	NA10847	43884	51
20	56283924	56285426	DUP	NA10847	1502	82
22	24274694	24393721	DUP	NA10847	119027	61
22	42879201	43005214	DUP	NA10847	126013	87
4	76948569	76977780	DUP	NA10847	29211	41
5	69283618	69338235	DUP	NA10847	54617	76
6	255650	384973	DUP	NA10847	129323	82
6	29653954	29928841	DUP	NA10847	274887	84
6	31958876	31985522	DUP	NA10847	26646	81
6	62178788	62919415	DUP	NA10847	740627	67
7	56087431	56089032	DUP	NA10847	1601	63
7	126514673	126552956	DUP	NA10847	38283	78
7	143218968	143568059	DUP	NA10847	349091	86
8	7342641	7355399	DUP	NA10847	12758	76
1	25589146	25662212	DEL	NA11829	73066	37
1	104153308	104161406	DEL	NA11829	8098	2
1	116135317	116677627	DEL	NA11829	542310	46
1	120526947	120697078	DEL	NA11829	170131	10
1	152555176	152590091	DEL	NA11829	34915	62
1	152760089	152771114	DEL	NA11829	11025	32
1	169059628	169621268	DEL	NA11829	561640	25
1	196723047	196815791	DEL	NA11829	92744	41
1	248729106	248797213	DEL	NA11829	68107	34
10	89148493	89276558	DEL	NA11829	128065	13
11	4966925	4977889	DEL	NA11829	10964	58
11	55364677	55453061	DEL	NA11829	88384	38
14	20200183	20423865	DEL	NA11829	223682	82
14	73998976	74028117	DEL	NA11829	29141	66
17	18355392	18465221	DEL	NA11829	109829	45
17	44401067	44752300	DEL	NA11829	351233	59
19	41350994	41380946	DEL	NA11829	29952	21
19	52692555	52696215	DEL	NA11829	3660	87
20	1557219	1560562	DEL	NA11829	3343	13
22	22381019	23248950	DEL	NA11829	867931	7
22	24344422	24396814	DEL	NA11829	52392	69
3	97887491	97919363	DEL	NA11829	31872	78
3	151511489	151551000	DEL	NA11829	39511	1
3	178550206	178568168	DEL	NA11829	17962	41
4	69360488	69542499	DEL	NA11829	182011	49
5	42628248	42631270	DEL	NA11829	3022	44
5	147553094	147555199	DEL	NA11829	2105	71
5	177157399	177198449	DEL	NA11829	41050	68
5	180374610	180433980	DEL	NA11829	59370	39
6	29837192	29921127	DEL	NA11829	83935	84
6	32431552	32573771	DEL	NA11829	142219	83
6	32609298	32632000	DEL	NA11829	22702	72
7	6854110	6864083	DEL	NA11829	9973	27
1	1567881	1683706	DUP	NA11829	115825	79
1	25585225	25665195	DUP	NA11829	79970	81
1	110186846	110259108	DUP	NA11829	72262	64
1	120755686	120936665	DUP	NA11829	180979	82
1	161409063	161646758	DUP	NA11829	237695	86
1	234744318	234747260	DUP	NA11829	2942	83
10	33189319	33190528	DUP	NA11829	1209	70
10	89149588	89275944	DUP	NA11829	126356	86
10	92617266	92618168	DUP	NA11829	902	90
11	55028247	55038507	DUP	NA11829	10260	78
12	10566089	10603748	DUP	NA11829	37659	85
12	71532675	71533665	DUP	NA11829	990	54
14	73994388	74051967	DUP	NA11829	57579	52
14	93712512	93713151	DUP	NA11829	639	42
15	30440575	30794939	DUP	NA11829	354364	84
15	32444256	32681359	DUP	NA11829	237103	80
15	34662754	34875351	DUP	NA11829	212597	86
15	94886323	94888595	DUP	NA11829	2272	24
15	99190120	99193816	DUP	NA11829	3696	85
16	222083	227514	DUP	NA11829	5431	84
16	2649818	2741812	DUP	NA11829	91994	50
16	14989863	15108587	DUP	NA11829	118724	77
16	21733697	21809459	DUP	NA11829	75762	82
16	28679547	28763122	DUP	NA11829	83575	84
16	70847248	71202529	DUP	NA11829	355281	85
17	39532301	39539624	DUP	NA11829	7323	87
19	43308866	43547145	DUP	NA11829	238279	85
19	52131804	52150223	DUP	NA11829	18419	81
19	53322989	53361358	DUP	NA11829	38369	82
2	179296203	179296985	DUP	NA11829	782	36
2	228241147	228258857	DUP	NA11829	17710	7
20	1556955	1561014	DUP	NA11829	4059	88
20	56283924	56285426	DUP	NA11829	1502	82
21	10736871	10943554	DUP	NA11829	206683	82
22	18810110	19006124	DUP	NA11829	196014	2
22	24283016	24340785	DUP	NA11829	57769	89
22	42879201	43005214	DUP	NA11829	126013	87
4	76948569	76977780	DUP	NA11829	29211	41
5	69283618	69338235	DUP	NA11829	54617	76
6	255650	384973	DUP	NA11829	129323	80
6	298700	379015	DUP	NA11829	80315	87
6	29653954	29928841	DUP	NA11829	274887	84
6	31280101	31341340	DUP	NA11829	61239	66
6	31958876	31985522	DUP	NA11829	26646	81
6	32592985	32614037	DUP	NA11829	21052	43
6	46795547	46831976	DUP	NA11829	36429	21
6	62178788	62919415	DUP	NA11829	740627	67
7	126514673	126552956	DUP	NA11829	38283	78
7	143218968	143568059	DUP	NA11829	349091	86
7	151901841	151908834	DUP	NA11829	6993	80
8	7342641	7355399	DUP	NA11829	12758	76
1	25589146	25662212	DEL	NA11830	73066	37
1	89476419	89478526	DEL	NA11830	2107	29
1	108733355	108737496	DEL	NA11830	4141	36
1	110186846	110259108	DEL	NA11830	72262	74
1	152555176	152590091	DEL	NA11830	34915	62
1	169059628	169621268	DEL	NA11830	561640	25
11	4966925	4977889	DEL	NA11830	10964	58
14	20200183	20423865	DEL	NA11830	223682	82
14	73998976	74028117	DEL	NA11830	29141	66
15	30851003	31093746	DEL	NA11830	242743	5
15	32900308	32925084	DEL	NA11830	24776	4
16	223618	225653	DEL	NA11830	2035	9
17	18355392	18465221	DEL	NA11830	109829	45
19	52692555	52696215	DEL	NA11830	3660	87
20	1557219	1560562	DEL	NA11830	3343	13
22	24283016	24340785	DEL	NA11830	57769	89
22	24344422	24396814	DEL	NA11830	52392	69
22	25619034	25928990	DEL	NA11830	309956	13
3	97887491	97919363	DEL	NA11830	31872	78
4	69360488	69542499	DEL	NA11830	182011	49
5	180374610	180433980	DEL	NA11830	59370	39
6	29837192	29921127	DEL	NA11830	83935	84
6	32431552	32573771	DEL	NA11830	142219	83
6	32609298	32632000	DEL	NA11830	22702	72
7	157338367	157350840	DEL	NA11830	12473	46
1	1567881	1683706	DUP	NA11830	115825	79
1	25585225	25665195	DUP	NA11830	79970	81
1	120755686	120936665	DUP	NA11830	180979	82
1	161409063	161646758	DUP	NA11830	237695	86
1	234744318	234747260	DUP	NA11830	2942	83
10	26345494	26361303	DUP	NA11830	15809	68
10	33189319	33190528	DUP	NA11830	1209	70
10	46478317	47429141	DUP	NA11830	950824	86
10	47746303	47792421	DUP	NA11830	46118	83
10	48105747	48280150	DUP	NA11830	174403	79
10	89149588	89275944	DUP	NA11830	126356	86
10	92617266	92618168	DUP	NA11830	902	90
11	18949072	18961988	DUP	NA11830	12916	48
11	55028247	55038507	DUP	NA11830	10260	78
12	10566089	10603748	DUP	NA11830	37659	85
13	21727231	21729991	DUP	NA11830	2760	11
14	20177210	20424753	DUP	NA11830	247543	48
14	73994388	74051967	DUP	NA11830	57579	52
15	22302006	22588022	DUP	NA11830	286016	62
15	30490438	30794939	DUP	NA11830	304501	85
15	32444256	32509148	DUP	NA11830	64892	84
15	34660520	34875351	DUP	NA11830	214831	83
15	99190120	99193816	DUP	NA11830	3696	85
16	222083	227514	DUP	NA11830	5431	84
16	2649818	2736115	DUP	NA11830	86297	87
16	14989863	15108587	DUP	NA11830	118724	77
16	21733697	21809459	DUP	NA11830	75762	82
16	28679547	28763122	DUP	NA11830	83575	84
16	55842125	55865379	DUP	NA11830	23254	26
16	70847248	71202529	DUP	NA11830	355281	85
17	39532301	39539624	DUP	NA11830	7323	87
19	40374820	40381531	DUP	NA11830	6711	4
19	43308866	43547145	DUP	NA11830	238279	85
19	52131804	52150223	DUP	NA11830	18419	81
19	53322989	53361358	DUP	NA11830	38369	82
19	54723919	54749032	DUP	NA11830	25113	84
2	179296203	179296985	DUP	NA11830	782	36
2	228241147	228258447	DUP	NA11830	17300	8
20	1556955	1561014	DUP	NA11830	4059	88
20	56283924	56285426	DUP	NA11830	1502	82
21	10736871	10943554	DUP	NA11830	206683	82
22	24274694	24393721	DUP	NA11830	119027	61
22	42879201	43005214	DUP	NA11830	126013	57
3	194384096	194400303	DUP	NA11830	16207	45
5	69283618	69338235	DUP	NA11830	54617	76
6	255650	384973	DUP	NA11830	129323	82
6	29653954	29928841	DUP	NA11830	274887	84
6	31280101	31341340	DUP	NA11830	61239	66
6	31958876	31985522	DUP	NA11830	26646	81
7	126514673	126552956	DUP	NA11830	38283	78
7	143218968	143568059	DUP	NA11830	349091	86
7	151901841	151908834	DUP	NA11830	6993	80
8	7342641	7355399	DUP	NA11830	12758	76
1	25589146	25662212	DEL	NA11831	73066	37
1	89476419	89478526	DEL	NA11831	2107	29
1	110186846	110259108	DEL	NA11831	72262	74
1	116135317	116677627	DEL	NA11831	542310	46
1	152555176	152590091	DEL	NA11831	34915	62
1	152760089	152771114	DEL	NA11831	11025	32
1	169059628	169621268	DEL	NA11831	561640	25
1	196723047	196815791	DEL	NA11831	92744	41
11	4966925	4977889	DEL	NA11831	10964	58
11	48327672	48328178	DEL	NA11831	506	7
11	55364677	55453061	DEL	NA11831	88384	38
12	123185095	123188038	DEL	NA11831	2943	6
14	20200183	20423865	DEL	NA11831	223682	82
14	73998976	74028117	DEL	NA11831	29141	66
17	18355392	18465221	DEL	NA11831	109829	45
19	35849493	35861848	DEL	NA11831	12355	31
19	54800397	54811362	DEL	NA11831	10965	37
22	24283016	24340785	DEL	NA11831	57769	89
3	97887491	97919363	DEL	NA11831	31872	78
5	42628248	42631270	DEL	NA11831	3022	44
5	147553094	147555199	DEL	NA11831	2105	71
5	177157399	177198449	DEL	NA11831	41050	68
6	29837192	29921127	DEL	NA11831	83935	84
6	32431552	32573771	DEL	NA11831	142219	83
6	32609298	32632000	DEL	NA11831	22702	72
7	66621964	66676630	DEL	NA11831	54666	36
7	157338367	157350840	DEL	NA11831	12473	46
1	17195155	17267496	DUP	NA11831	72341	68
1	25585225	25665195	DUP	NA11831	79970	81
1	120755686	120936665	DUP	NA11831	180979	82
1	161409063	161646758	DUP	NA11831	237695	86
1	234744318	234747260	DUP	NA11831	2942	83
10	26345494	26361303	DUP	NA11831	15809	68
10	33189319	33190528	DUP	NA11831	1209	70
10	46478317	47429141	DUP	NA11831	950824	86
10	47746303	47792421	DUP	NA11831	46118	83
10	48105747	48280150	DUP	NA11831	174403	79
10	89149588	89275944	DUP	NA11831	126356	86
10	92617266	92618168	DUP	NA11831	902	90
11	55028247	55038507	DUP	NA11831	10260	78
12	10566089	10603748	DUP	NA11831	37659	85
12	123178106	123210671	DUP	NA11831	32565	3
14	20177210	20424753	DUP	NA11831	247543	48
15	22302006	22588022	DUP	NA11831	286016	62
15	30440575	30794939	DUP	NA11831	354364	84
15	34662754	34875351	DUP	NA11831	212597	86
15	99190120	99193816	DUP	NA11831	3696	85
16	222083	227514	DUP	NA11831	5431	84
16	2649818	2736115	DUP	NA11831	86297	87
16	14989863	15108587	DUP	NA11831	118724	77
16	21733697	21809459	DUP	NA11831	75762	82
16	28679547	28763122	DUP	NA11831	83575	84
16	70847248	71202529	DUP	NA11831	355281	85
16	74396294	74452036	DUP	NA11831	55742	49
17	39532301	39539624	DUP	NA11831	7323	87
17	44401067	44752300	DUP	NA11831	351233	59
19	17443249	17450279	DUP	NA11831	7030	3
19	41337301	41393256	DUP	NA11831	55955	68
19	43308866	43547145	DUP	NA11831	238279	85
19	52131804	52150223	DUP	NA11831	18419	81
19	53322989	53361358	DUP	NA11831	38369	82
19	54723919	54749032	DUP	NA11831	25113	84
20	1552338	1596222	DUP	NA11831	43884	51
20	56283924	56285426	DUP	NA11831	1502	82
21	10736871	10943554	DUP	NA11831	206683	82
22	21725998	21845294	DUP	NA11831	119296	35
22	24274694	24393721	DUP	NA11831	119027	61
22	24578505	24580887	DUP	NA11831	2382	1
22	42879201	43005214	DUP	NA11831	126013	87
4	76948569	76977780	DUP	NA11831	29211	41
5	69283618	69338235	DUP	NA11831	54617	76
6	255650	384973	DUP	NA11831	129323	82
6	29653954	29928841	DUP	NA11831	274887	84
6	31280101	31341340	DUP	NA11831	61239	66
6	32411907	32779836	DUP	NA11831	367929	27
6	62178788	62919415	DUP	NA11831	740627	67
7	126514673	126552956	DUP	NA11831	38283	78
7	143218968	143568059	DUP	NA11831	349091	86
7	151901841	151908834	DUP	NA11831	6993	80
8	7342641	7355399	DUP	NA11831	12758	76
1	25589146	25662212	DEL	NA11832	73066	37
1	89476419	89478526	DEL	NA11832	2107	29
1	110224384	110242953	DEL	NA11832	18569	89
1	152555176	152590091	DEL	NA11832	34915	62
1	152760089	152771114	DEL	NA11832	11025	32
1	169059628	169621268	DEL	NA11832	561640	25
1	196723047	196815791	DEL	NA11832	92744	41
10	46478317	46685625	DEL	NA11832	207308	5
11	55364677	55453061	DEL	NA11832	88384	38
14	20200183	20423865	DEL	NA11832	223682	82
17	18355392	18465221	DEL	NA11832	109829	45
17	44401067	44752300	DEL	NA11832	351233	59
19	35849493	35861848	DEL	NA11832	12355	31
19	52692555	52696215	DEL	NA11832	3660	87
20	1557219	1560562	DEL	NA11832	3343	13
22	24344422	24396814	DEL	NA11832	52392	69
3	178550206	178568168	DEL	NA11832	17962	41
4	69360488	69542499	DEL	NA11832	182011	49
5	42628248	42631270	DEL	NA11832	3022	44
5	140222149	140243756	DEL	NA11832	21607	9
5	147553094	147555199	DEL	NA11832	2105	71
5	177157399	177198449	DEL	NA11832	41050	68
6	29837192	29921127	DEL	NA11832	83935	84
6	32431552	32573771	DEL	NA11832	142219	83
7	66621964	66676630	DEL	NA11832	54666	36
7	157338367	157350840	DEL	NA11832	12473	46
1	1567881	1683706	DUP	NA11832	115825	79
1	17195155	17267496	DUP	NA11832	72341	68
1	25585225	25665195	DUP	NA11832	79970	81
1	110186846	110259108	DUP	NA11832	72262	60
1	120755686	120936665	DUP	NA11832	180979	82
1	161409063	161646758	DUP	NA11832	237695	86
1	234744318	234747260	DUP	NA11832	2942	83
10	47746303	47792421	DUP	NA11832	46118	83
10	89149588	89275944	DUP	NA11832	126356	86
10	92617266	92618168	DUP	NA11832	902	90
11	18949072	18961988	DUP	NA11832	12916	48
11	55028247	55038507	DUP	NA11832	10260	78
12	49676002	49690399	DUP	NA11832	14397	3
14	20177210	20424753	DUP	NA11832	247543	48
14	73994388	74051967	DUP	NA11832	57579	52
15	30440575	30794939	DUP	NA11832	354364	84
15	32444256	32509148	DUP	NA11832	64892	84
15	34660520	34875351	DUP	NA11832	214831	81
15	99190120	99193816	DUP	NA11832	3696	85
16	222083	227514	DUP	NA11832	5431	84
16	2649818	2736115	DUP	NA11832	86297	87
16	14989863	15108587	DUP	NA11832	118724	77
16	28679547	28763122	DUP	NA11832	83575	84
16	55842382	55862710	DUP	NA11832	20328	28
17	39532301	39539624	DUP	NA11832	7323	87
17	44165801	44364214	DUP	NA11832	198413	25
19	41337301	41393256	DUP	NA11832	55955	68
19	43294390	43519362	DUP	NA11832	224972	5
19	43556841	43596971	DUP	NA11832	40130	2
19	54723919	54749032	DUP	NA11832	25113	84
20	56283924	56285426	DUP	NA11832	1502	82
21	10736871	10943554	DUP	NA11832	206683	82
22	21725998	21845294	DUP	NA11832	119296	35
22	24283016	24340785	DUP	NA11832	57769	89
4	76948569	76977780	DUP	NA11832	29211	41
5	69283618	69338235	DUP	NA11832	54617	76
5	180041765	180045486	DUP	NA11832	3721	3
6	255650	384973	DUP	NA11832	129323	84
6	29653954	29928841	DUP	NA11832	274887	84
6	31280101	31341340	DUP	NA11832	61239	66
6	32411907	32779836	DUP	NA11832	367929	27
7	126514673	126552956	DUP	NA11832	38283	78
7	143218968	143568059	DUP	NA11832	349091	86
7	151901841	151908834	DUP	NA11832	6993	80
8	7342641	7355399	DUP	NA11832	12758	76
1	25589146	25662212	DEL	NA11840	73066	37
1	110224384	110242953	DEL	NA11840	18569	89
1	116135317	116677627	DEL	NA11840	542310	46
1	120526947	120697078	DEL	NA11840	170131	10
1	149622963	149801822	DEL	NA11840	178859	9
1	152555176	152590091	DEL	NA11840	34915	62
1	196723047	196815791	DEL	NA11840	92744	41
1	248729106	248797213	DEL	NA11840	68107	34
10	89148493	89276558	DEL	NA11840	128065	13
11	4966925	4977889	DEL	NA11840	10964	58
11	5784859	5809477	DEL	NA11840	24618	34
11	55364677	55453061	DEL	NA11840	88384	38
12	11504579	11568972	DEL	NA11840	64393	19
12	53086387	53087927	DEL	NA11840	1540	6
14	20200183	20423865	DEL	NA11840	223682	82
14	73998976	74028117	DEL	NA11840	29141	66
17	18355392	18465221	DEL	NA11840	109829	45
19	52692555	52696215	DEL	NA11840	3660	87
19	54800397	54811362	DEL	NA11840	10965	37
22	24283016	24340785	DEL	NA11840	57769	89
22	24344422	24396814	DEL	NA11840	52392	69
3	97887491	97919363	DEL	NA11840	31872	78
3	178550206	178568168	DEL	NA11840	17962	41
5	42628248	42631270	DEL	NA11840	3022	44
5	147553094	147555199	DEL	NA11840	2105	71
5	177157399	177198449	DEL	NA11840	41050	68
6	29837192	29921127	DEL	NA11840	83935	84
6	31280101	31341340	DEL	NA11840	61239	66
6	32431552	32573771	DEL	NA11840	142219	83
6	32609298	32632000	DEL	NA11840	22702	72
7	66621964	66676630	DEL	NA11840	54666	36
7	157338367	157350840	DEL	NA11840	12473	46
8	132991085	132994576	DEL	NA11840	3491	3
1	1567881	1683706	DUP	NA11840	115825	79
1	17195155	17267496	DUP	NA11840	72341	68
1	25585225	25665195	DUP	NA11840	79970	81
1	110186846	110259108	DUP	NA11840	72262	51
1	161409063	161646758	DUP	NA11840	237695	86
1	234744318	234747260	DUP	NA11840	2942	83
10	26345494	26361303	DUP	NA11840	15809	68
10	89149588	89275944	DUP	NA11840	126356	86
10	92617266	92618168	DUP	NA11840	902	90
11	18949072	18961988	DUP	NA11840	12916	48
11	55028247	55038507	DUP	NA11840	10260	78
12	7995278	8123900	DUP	NA11840	128622	4
12	10566089	10603748	DUP	NA11840	37659	85
12	63939724	64120642	DUP	NA11840	180918	1
13	21727231	21729991	DUP	NA11840	2760	11
13	76107773	76119573	DUP	NA11840	11800	6
14	20177210	20424753	DUP	NA11840	247543	48
15	22302006	22588022	DUP	NA11840	286016	62
15	30440575	30794939	DUP	NA11840	354364	84
15	32444256	32681359	DUP	NA11840	237103	80
15	34660520	34875351	DUP	NA11840	214831	83
15	43892841	43894806	DUP	NA11840	1965	7
15	99190120	99193816	DUP	NA11840	3696	85
16	222083	227514	DUP	NA11840	5431	84
16	2649818	2736115	DUP	NA11840	86297	87
16	28679547	28763122	DUP	NA11840	83575	84
16	70847248	71202529	DUP	NA11840	355281	85
16	74396294	74452036	DUP	NA11840	55742	49
17	39532301	39539624	DUP	NA11840	7323	87
19	41337301	41393256	DUP	NA11840	55955	68
19	43308866	43547145	DUP	NA11840	238279	85
19	52131804	52150223	DUP	NA11840	18419	81
19	53322989	53361358	DUP	NA11840	38369	82
19	54723919	54749032	DUP	NA11840	25113	84
2	179296203	179296985	DUP	NA11840	782	36
20	1556955	1561014	DUP	NA11840	4059	88
20	56283924	56285426	DUP	NA11840	1502	82
21	10736871	10943554	DUP	NA11840	206683	82
22	24274694	24393721	DUP	NA11840	119027	61
22	42879201	43005214	DUP	NA11840	126013	87
3	194384096	194400303	DUP	NA11840	16207	45
5	69283618	69338235	DUP	NA11840	54617	76
6	255650	384973	DUP	NA11840	129323	82
6	29653954	29928841	DUP	NA11840	274887	84
6	31958876	31985522	DUP	NA11840	26646	81
6	32592985	32614037	DUP	NA11840	21052	43
7	143218968	143568059	DUP	NA11840	349091	86
7	151901841	151908834	DUP	NA11840	6993	80
8	7342641	7355399	DUP	NA11840	12758	76
1	110224384	110242953	DEL	NA11881	18569	89
1	149622963	149801822	DEL	NA11881	178859	17
1	152555176	152590091	DEL	NA11881	34915	62
1	169059628	169621268	DEL	NA11881	561640	25
1	196723047	196815791	DEL	NA11881	92744	41
1	248729106	248797213	DEL	NA11881	68107	34
11	4966925	4977889	DEL	NA11881	10964	58
11	55364677	55453061	DEL	NA11881	88384	38
14	20200183	20423865	DEL	NA11881	223682	82
14	73998976	74028117	DEL	NA11881	29141	66
17	44401067	44752300	DEL	NA11881	351233	59
19	52131804	52150223	DEL	NA11881	18419	81
19	52692555	52696215	DEL	NA11881	3660	87
22	24283016	24340785	DEL	NA11881	57769	89
3	97887491	97919363	DEL	NA11881	31872	78
5	42628248	42631270	DEL	NA11881	3022	44
5	147553094	147555199	DEL	NA11881	2105	71
5	177157399	177198449	DEL	NA11881	41050	68
5	180374610	180433980	DEL	NA11881	59370	39
6	29837192	29921127	DEL	NA11881	83935	84
7	66621964	66676630	DEL	NA11881	54666	36
7	157338367	157350840	DEL	NA11881	12473	46
1	1567881	1683706	DUP	NA11881	115825	79
1	25585225	25665195	DUP	NA11881	79970	81
1	104109238	104159384	DUP	NA11881	50146	11
1	120755686	120936665	DUP	NA11881	180979	82
1	161409063	161646758	DUP	NA11881	237695	86
1	234744318	234747260	DUP	NA11881	2942	83
10	33189319	33190528	DUP	NA11881	1209	70
10	46478317	47429141	DUP	NA11881	950824	86
10	47746303	47792421	DUP	NA11881	46118	83
10	48105747	48280150	DUP	NA11881	174403	79
10	89149588	89275944	DUP	NA11881	126356	86
10	92617266	92618168	DUP	NA11881	902	90
11	18949072	18961988	DUP	NA11881	12916	48
11	55028247	55038507	DUP	NA11881	10260	78
12	10566089	10603748	DUP	NA11881	37659	85
12	71532675	71533665	DUP	NA11881	990	54
14	20177210	20424753	DUP	NA11881	247543	48
15	22302006	22588022	DUP	NA11881	286016	62
15	30440575	30794939	DUP	NA11881	354364	84
15	32444256	32681359	DUP	NA11881	237103	80
15	34660520	34875351	DUP	NA11881	214831	83
15	94886323	94888595	DUP	NA11881	2272	24
15	99190120	99193816	DUP	NA11881	3696	85
16	222083	227514	DUP	NA11881	5431	84
16	2649818	2736115	DUP	NA11881	86297	87
16	14989863	15108587	DUP	NA11881	118724	77
16	21733697	21809459	DUP	NA11881	75762	82
16	28679547	28763122	DUP	NA11881	83575	84
16	70847248	71202529	DUP	NA11881	355281	85
17	39532301	39539624	DUP	NA11881	7323	87
17	44165801	44364214	DUP	NA11881	198413	25
19	41337301	41393256	DUP	NA11881	55955	68
19	43308866	43547145	DUP	NA11881	238279	85
19	53322989	53361358	DUP	NA11881	38369	82
19	54723919	54749032	DUP	NA11881	25113	84
20	1556955	1561014	DUP	NA11881	4059	88
20	56283924	56285426	DUP	NA11881	1502	82
21	10736871	10943554	DUP	NA11881	206683	82
22	24274694	24393721	DUP	NA11881	119027	61
22	42879201	43005214	DUP	NA11881	126013	87
3	194384096	194400303	DUP	NA11881	16207	45
4	76948569	76977780	DUP	NA11881	29211	41
5	69283618	69338235	DUP	NA11881	54617	76
6	255650	384973	DUP	NA11881	129323	82
6	29653954	29928841	DUP	NA11881	274887	84
6	31280101	31341340	DUP	NA11881	61239	66
6	31958876	31985522	DUP	NA11881	26646	81
6	32411907	32779836	DUP	NA11881	367929	35
7	126514673	126552956	DUP	NA11881	38283	78
7	143218968	143568059	DUP	NA11881	349091	86
7	151901841	151908834	DUP	NA11881	6993	80
8	7342641	7355399	DUP	NA11881	12758	76
1	25589146	25662212	DEL	NA11992	73066	37
1	110224384	110242953	DEL	NA11992	18569	89
1	112692629	113246263	DEL	NA11992	553634	9
1	120526947	120697078	DEL	NA11992	170131	10
1	152555176	152590091	DEL	NA11992	34915	62
10	89148493	89276558	DEL	NA11992	128065	13
11	4966925	4977889	DEL	NA11992	10964	58
11	55364677	55453061	DEL	NA11992	88384	38
14	20200183	20423865	DEL	NA11992	223682	82
15	30851003	31093746	DEL	NA11992	242743	6
15	43892841	43894806	DEL	NA11992	1965	7
17	15542699	15546790	DEL	NA11992	4091	21
17	44401067	44752300	DEL	NA11992	351233	59
19	35849254	35865601	DEL	NA11992	16347	27
19	43703033	43756237	DEL	NA11992	53204	29
19	52131804	52150223	DEL	NA11992	18419	81
19	52692555	52696215	DEL	NA11992	3660	87
22	22381019	23248950	DEL	NA11992	867931	7
22	24283016	24340785	DEL	NA11992	57769	89
22	24344422	24396814	DEL	NA11992	52392	69
22	33780263	33783473	DEL	NA11992	3210	7
3	186386577	186424582	DEL	NA11992	38005	4
4	69360488	69542499	DEL	NA11992	182011	49
5	42628248	42631270	DEL	NA11992	3022	44
5	147553094	147555199	DEL	NA11992	2105	71
5	177157399	177198449	DEL	NA11992	41050	68
6	29837192	29921127	DEL	NA11992	83935	84
6	32431552	32573771	DEL	NA11992	142219	83
6	32592985	32632000	DEL	NA11992	39015	57
7	76179714	76565750	DEL	NA11992	386036	9
7	157338367	157350840	DEL	NA11992	12473	46
1	1567881	1683706	DUP	NA11992	115825	79
1	17195155	17267496	DUP	NA11992	72341	68
1	25585225	25665195	DUP	NA11992	79970	81
1	110186846	110259108	DUP	NA11992	72262	60
1	120755686	120936665	DUP	NA11992	180979	82
1	161409063	161646758	DUP	NA11992	237695	86
1	234744318	234747260	DUP	NA11992	2942	83
10	33189319	33190528	DUP	NA11992	1209	70
10	46478317	47429141	DUP	NA11992	950824	86
10	47746303	47792421	DUP	NA11992	46118	83
10	48105747	48280150	DUP	NA11992	174403	79
10	89149588	89275944	DUP	NA11992	126356	86
10	92617266	92618168	DUP	NA11992	902	90
11	18949072	18961988	DUP	NA11992	12916	48
11	55028247	55038507	DUP	NA11992	10260	78
12	71532675	71533665	DUP	NA11992	990	54
14	73994388	74051967	DUP	NA11992	57579	52
15	22302006	22588022	DUP	NA11992	286016	62
15	34660520	34875351	DUP	NA11992	214831	83
15	94886323	94888595	DUP	NA11992	2272	24
15	99190120	99193816	DUP	NA11992	3696	85
16	222083	227514	DUP	NA11992	5431	84
16	2649818	2741812	DUP	NA11992	91994	50
16	14989863	15108587	DUP	NA11992	118724	77
16	21733697	21809459	DUP	NA11992	75762	82
16	28679547	28763122	DUP	NA11992	83575	84
16	70847248	71202529	DUP	NA11992	355281	85
16	74396294	74452036	DUP	NA11992	55742	49
17	39532301	39539624	DUP	NA11992	7323	47
17	44165801	44364214	DUP	NA11992	198413	25
19	41337301	41393256	DUP	NA11992	55955	68
19	43308866	43547145	DUP	NA11992	238279	85
19	53322989	53361358	DUP	NA11992	38369	82
19	54723919	54749032	DUP	NA11992	25113	84
20	1552338	1596222	DUP	NA11992	43884	51
20	56283924	56285426	DUP	NA11992	1502	82
21	10736871	10943554	DUP	NA11992	206683	82
21	44822523	44838545	DUP	NA11992	16022	2
22	24274694	24393721	DUP	NA11992	119027	61
22	42879201	43005214	DUP	NA11992	126013	87
5	69283618	69338235	DUP	NA11992	54617	76
6	255650	384973	DUP	NA11992	129323	82
6	29653954	29928841	DUP	NA11992	274887	84
6	31958876	31985522	DUP	NA11992	26646	81
6	62178788	62919415	DUP	NA11992	740627	67
7	56087431	56089032	DUP	NA11992	1601	63
7	143218968	143568059	DUP	NA11992	349091	86
7	151901841	151908834	DUP	NA11992	6993	80
8	7342641	7355399	DUP	NA11992	12758	76
1	108733355	108737496	DEL	NA11994	4141	36
1	110186846	110259108	DEL	NA11994	72262	74
1	116135317	116677627	DEL	NA11994	542310	46
1	152555176	152590091	DEL	NA11994	34915	62
1	152760089	152771114	DEL	NA11994	11025	32
1	169059628	169621268	DEL	NA11994	561640	25
1	248729106	248797213	DEL	NA11994	68107	34
10	96856006	96996043	DEL	NA11994	140037	24
11	4966925	4977889	DEL	NA11994	10964	58
11	5784859	5809477	DEL	NA11994	24618	34
11	18949072	18961988	DEL	NA11994	12916	48
11	54965608	55036472	DEL	NA11994	70864	26
14	73998976	74028117	DEL	NA11994	29141	66
17	18355392	18465221	DEL	NA11994	109829	45
17	44401067	44752300	DEL	NA11994	351233	59
19	35849254	35865601	DEL	NA11994	16347	27
19	52692555	52696215	DEL	NA11994	3660	87
21	14594235	15148133	DEL	NA11994	553898	1
22	22453535	22735522	DEL	NA11994	281987	8
22	24283016	24340785	DEL	NA11994	57769	89
22	24344422	24396814	DEL	NA11994	52392	69
3	97887491	97919363	DEL	NA11994	31872	78
5	42628248	42631270	DEL	NA11994	3022	44
5	147553094	147555199	DEL	NA11994	2105	71
5	177157399	177198449	DEL	NA11994	41050	68
5	180374610	180433980	DEL	NA11994	59370	39
6	29837192	29921127	DEL	NA11994	83935	84
6	32431552	32573771	DEL	NA11994	142219	83
6	32609298	32632000	DEL	NA11994	22702	72
7	157338367	157350840	DEL	NA11994	12473	46
1	1567881	1683706	DUP	NA11994	115825	79
1	17195155	17267496	DUP	NA11994	72341	68
1	25585225	25665195	DUP	NA11994	79970	81
1	120755686	120936665	DUP	NA11994	180979	82
1	161479945	161646758	DUP	NA11994	166813	88
1	234744318	234747260	DUP	NA11994	2942	83
10	33189319	33190528	DUP	NA11994	1209	70
10	46478317	47429141	DUP	NA11994	950824	86
10	47746303	47792421	DUP	NA11994	46118	83
10	48105747	48280150	DUP	NA11994	174403	79
10	89149588	89275944	DUP	NA11994	126356	86
10	92617266	92618168	DUP	NA11994	902	90
11	55028247	55038507	DUP	NA11994	10260	78
12	10566089	10603748	DUP	NA11994	37659	85
12	71532675	71533665	DUP	NA11994	990	54
12	124496106	124499990	DUP	NA11994	3884	11
13	21727231	21729991	DUP	NA11994	2760	11
14	20177210	20424753	DUP	NA11994	247543	59
14	73994388	74051967	DUP	NA11994	57579	52
14	93712512	93713151	DUP	NA11994	639	42
15	22302006	22588022	DUP	NA11994	286016	62
15	30440575	30794939	DUP	NA11994	354364	84
15	32444256	32681359	DUP	NA11994	237103	80
15	34660520	34875351	DUP	NA11994	214831	83
15	99190120	99193816	DUP	NA11994	3696	85
16	222083	227514	DUP	NA11994	5431	84
16	2649818	2736115	DUP	NA11994	86297	87
16	14989863	15108587	DUP	NA11994	118724	77
16	21733697	21809459	DUP	NA11994	75762	82
16	28679547	28763122	DUP	NA11994	83575	84
16	70847248	71202529	DUP	NA11994	355281	85
16	74396294	74452036	DUP	NA11994	55742	49
17	39532301	39539624	DUP	NA11994	7323	47
17	44165801	44364214	DUP	NA11994	198413	25
19	41337301	41393256	DUP	NA11994	55955	68
19	43308866	43547145	DUP	NA11994	238279	85
19	52131804	52150223	DUP	NA11994	18419	81
19	53322989	53361358	DUP	NA11994	38369	82
19	54723919	54749032	DUP	NA11994	25113	84
2	179296203	179296985	DUP	NA11994	782	36
20	1552338	1596222	DUP	NA11994	43884	51
20	56283924	56285426	DUP	NA11994	1502	82
21	10736871	10943554	DUP	NA11994	206683	82
22	24274694	24393721	DUP	NA11994	119027	61
22	42879201	43005214	DUP	NA11994	126013	87
3	194384096	194400303	DUP	NA11994	16207	45
4	76948569	76977780	DUP	NA11994	29211	41
5	69283618	69338235	DUP	NA11994	54617	76
6	255650	384973	DUP	NA11994	129323	82
6	29653954	29928841	DUP	NA11994	274887	84
6	31280101	31341340	DUP	NA11994	61239	66
6	31958876	31985522	DUP	NA11994	26646	81
6	32592985	32614037	DUP	NA11994	21052	43
6	62178788	62919415	DUP	NA11994	740627	67
7	126514673	126552956	DUP	NA11994	38283	78
7	143218968	143568059	DUP	NA11994	349091	86
7	151901841	151908834	DUP	NA11994	6993	80
8	7342641	7355399	DUP	NA11994	12758	76
1	89476419	89478526	DEL	NA11995	2107	29
1	110224384	110242953	DEL	NA11995	18569	89
1	149622963	149801822	DEL	NA11995	178859	17
1	169059628	169621268	DEL	NA11995	561640	25
1	248729106	248797213	DEL	NA11995	68107	34
11	4966925	4977889	DEL	NA11995	10964	58
11	5784859	5809477	DEL	NA11995	24618	34
11	7812858	7841583	DEL	NA11995	28725	19
14	20200183	20423865	DEL	NA11995	223682	82
14	73998976	74028117	DEL	NA11995	29141	66
17	18355392	18465221	DEL	NA11995	109829	45
19	35849254	35865601	DEL	NA11995	16347	27
19	52131804	52150223	DEL	NA11995	18419	81
19	52692555	52696215	DEL	NA11995	3660	87
22	24283016	24340785	DEL	NA11995	57769	89
22	24344422	24396814	DEL	NA11995	52392	69
22	25619034	25928990	DEL	NA11995	309956	13
3	97887491	97919363	DEL	NA11995	31872	78
3	178550206	178568168	DEL	NA11995	17962	41
4	69360488	69542499	DEL	NA11995	182011	49
4	70127644	70239100	DEL	NA11995	111456	26
5	147553094	147555199	DEL	NA11995	2105	71
6	29837192	29921127	DEL	NA11995	83935	84
6	31280101	31341340	DEL	NA11995	61239	66
6	32431552	32573771	DEL	NA11995	142219	83
7	66621964	66676630	DEL	NA11995	54666	36
7	157338367	157350840	DEL	NA11995	12473	46
8	7342641	7355399	DEL	NA11995	12758	76
1	1567881	1683706	DUP	NA11995	115825	79
1	25585225	25665195	DUP	NA11995	79970	81
1	110186846	110259108	DUP	NA11995	72262	51
1	120755686	120936665	DUP	NA11995	180979	82
1	161409063	161646758	DUP	NA11995	237695	86
1	234744318	234747260	DUP	NA11995	2942	83
10	33189319	33190528	DUP	NA11995	1209	70
10	46478317	47429141	DUP	NA11995	950824	45
10	48105747	48280150	DUP	NA11995	174403	79
10	89149588	89275944	DUP	NA11995	126356	86
10	92617266	92618168	DUP	NA11995	902	90
11	18949072	18961988	DUP	NA11995	12916	48
11	55028247	55038507	DUP	NA11995	10260	78
12	10566089	10603748	DUP	NA11995	37659	85
14	73994388	74051967	DUP	NA11995	57579	52
14	93712512	93713151	DUP	NA11995	639	42
15	22302006	22588022	DUP	NA11995	286016	62
15	30440575	30794939	DUP	NA11995	354364	84
15	32444256	32681359	DUP	NA11995	237103	80
15	34660520	34875351	DUP	NA11995	214831	83
15	99190120	99193816	DUP	NA11995	3696	85
16	222083	227514	DUP	NA11995	5431	84
16	2649818	2736115	DUP	NA11995	86297	87
16	14989863	15108587	DUP	NA11995	118724	77
16	21733697	21809459	DUP	NA11995	75762	82
16	28679547	28763122	DUP	NA11995	83575	84
16	55842125	55865379	DUP	NA11995	23254	26
16	70847248	71202529	DUP	NA11995	355281	85
17	39532301	39539624	DUP	NA11995	7323	87
17	44165801	44364214	DUP	NA11995	198413	25
17	44401067	44752300	DUP	NA11995	351233	59
18	61382356	61945364	DUP	NA11995	563008	1
19	41337301	41393256	DUP	NA11995	55955	68
19	43308866	43547145	DUP	NA11995	238279	85
19	51254643	51275079	DUP	NA11995	20436	1
19	53322989	53361358	DUP	NA11995	38369	82
19	54723919	54749032	DUP	NA11995	25113	84
19	57988560	58003720	DUP	NA11995	15160	1
2	228241147	228258857	DUP	NA11995	17710	7
20	1552338	1596222	DUP	NA11995	43884	51
20	56283924	56285426	DUP	NA11995	1502	82
21	10736871	10943554	DUP	NA11995	206683	82
22	21725998	21845294	DUP	NA11995	119296	35
22	24274694	24393721	DUP	NA11995	119027	61
22	35457951	35469677	DUP	NA11995	11726	1
22	42879201	43005214	DUP	NA11995	126013	87
4	76948569	76977780	DUP	NA11995	29211	41
5	69283618	69338235	DUP	NA11995	54617	76
6	255650	384973	DUP	NA11995	129323	82
6	29653954	29928841	DUP	NA11995	274887	84
6	31958876	31985522	DUP	NA11995	26646	81
6	32411907	32779836	DUP	NA11995	367929	27
6	62178788	62919415	DUP	NA11995	740627	67
7	126514673	126552956	DUP	NA11995	38283	78
7	143218968	143568059	DUP	NA11995	349091	86
7	151901841	151908834	DUP	NA11995	6993	80
1	1627918	1672603	DEL	NA12003	44685	13
1	25589146	25662212	DEL	NA12003	73066	37
1	108733355	108737496	DEL	NA12003	4141	36
1	110224384	110242953	DEL	NA12003	18569	89
1	152555176	152590091	DEL	NA12003	34915	62
1	152760089	152771114	DEL	NA12003	11025	32
1	169059628	169621268	DEL	NA12003	561640	25
10	89148493	89276558	DEL	NA12003	128065	13
11	5784859	5809477	DEL	NA12003	24618	34
11	55364677	55453061	DEL	NA12003	88384	38
12	10583367	10596119	DEL	NA12003	12752	27
14	20200183	20423865	DEL	NA12003	223682	82
16	223618	225653	DEL	NA12003	2035	9
17	44401067	44752300	DEL	NA12003	351233	59
19	35849254	35865601	DEL	NA12003	16347	27
19	43703033	43756237	DEL	NA12003	53204	29
19	46622580	46628261	DEL	NA12003	5681	10
19	52692555	52696215	DEL	NA12003	3660	87
19	54800397	54811362	DEL	NA12003	10965	37
22	24283016	24340785	DEL	NA12003	57769	89
22	24344422	24396814	DEL	NA12003	52392	69
3	97887491	97919363	DEL	NA12003	31872	78
3	178550206	178568168	DEL	NA12003	17962	41
4	70127644	70239100	DEL	NA12003	111456	26
5	147553094	147555199	DEL	NA12003	2105	71
5	177157399	177198449	DEL	NA12003	41050	68
5	180374610	180433980	DEL	NA12003	59370	39
6	29837192	29921127	DEL	NA12003	83935	84
6	31280101	31341340	DEL	NA12003	61239	66
6	32431552	32573771	DEL	NA12003	142219	83
6	32609298	32632000	DEL	NA12003	22702	72
6	62178788	62919415	DEL	NA12003	740627	67
7	66621964	66676630	DEL	NA12003	54666	36
7	157338367	157350840	DEL	NA12003	12473	46
1	12909237	12927107	DUP	NA12003	17870	20
1	17195155	17267496	DUP	NA12003	72341	68
1	25585225	25665195	DUP	NA12003	79970	81
1	120755686	120936665	DUP	NA12003	180979	82
1	161409063	161646758	DUP	NA12003	237695	86
1	234744318	234747260	DUP	NA12003	2942	83
10	33189319	33190528	DUP	NA12003	1209	70
10	46478317	47429141	DUP	NA12003	950824	86
10	47746303	47792421	DUP	NA12003	46118	83
10	48105747	48280150	DUP	NA12003	174403	79
10	89149588	89275944	DUP	NA12003	126356	86
10	92617266	92618168	DUP	NA12003	902	90
10	93668098	93668730	DUP	NA12003	632	2
11	18949072	18961988	DUP	NA12003	12916	48
11	55028247	55038507	DUP	NA12003	10260	78
12	10566089	10603748	DUP	NA12003	37659	85
12	11504579	11568972	DUP	NA12003	64393	22
12	71532675	71533665	DUP	NA12003	990	54
12	124496106	124499990	DUP	NA12003	3884	11
14	73994388	74051967	DUP	NA12003	57579	52
14	103988029	103989824	DUP	NA12003	1795	3
15	30440575	30794939	DUP	NA12003	354364	84
15	32444256	32681359	DUP	NA12003	237103	80
15	34660520	34875351	DUP	NA12003	214831	83
15	99190120	99193816	DUP	NA12003	3696	85
16	222083	227514	DUP	NA12003	5431	84
16	14989863	15108587	DUP	NA12003	118724	77
16	21733697	21809459	DUP	NA12003	75762	82
16	70847248	71202529	DUP	NA12003	355281	85
17	18355392	18465221	DUP	NA12003	109829	45
17	39532301	39539624	DUP	NA12003	7323	87
19	41337301	41393256	DUP	NA12003	55955	68
19	43308866	43547145	DUP	NA12003	238279	85
19	52131804	52150223	DUP	NA12003	18419	81
19	53322989	53361358	DUP	NA12003	38369	82
19	54723919	54749032	DUP	NA12003	25113	84
2	179296203	179296985	DUP	NA12003	782	36
20	1556955	1561014	DUP	NA12003	4059	88
20	56283924	56285426	DUP	NA12003	1502	82
21	10736871	10943554	DUP	NA12003	206683	82
22	24274694	24393721	DUP	NA12003	119027	61
22	42879201	43005214	DUP	NA12003	126013	87
4	76948569	76977780	DUP	NA12003	29211	41
5	69283618	69338235	DUP	NA12003	54617	76
6	255650	384973	DUP	NA12003	129323	82
6	29653954	29928841	DUP	NA12003	274887	84
6	31958876	31985522	DUP	NA12003	26646	81
6	32411907	32779836	DUP	NA12003	367929	35
7	76060899	76144728	DUP	NA12003	83829	2
7	99809377	99937347	DUP	NA12003	127970	1
7	126514673	126552956	DUP	NA12003	38283	78
7	143218968	143568059	DUP	NA12003	349091	86
8	7342641	7355399	DUP	NA12003	12758	76
1	25589146	25662212	DEL	NA12005	73066	37
1	108733355	108737496	DEL	NA12005	4141	36
1	110224384	110242953	DEL	NA12005	18569	89
1	152555176	152590091	DEL	NA12005	34915	62
10	89148493	89276558	DEL	NA12005	128065	13
11	4966925	4977889	DEL	NA12005	10964	58
11	54694268	55038507	DEL	NA12005	344239	17
14	20200183	20423865	DEL	NA12005	223682	82
17	44401067	44752300	DEL	NA12005	351233	59
19	52692555	52696215	DEL	NA12005	3660	87
20	1557219	1560562	DEL	NA12005	3343	13
22	22381019	23248950	DEL	NA12005	867931	8
22	24283016	24340785	DEL	NA12005	57769	89
3	97887491	97919363	DEL	NA12005	31872	78
4	69372327	69542499	DEL	NA12005	170172	51
5	42628248	42631270	DEL	NA12005	3022	44
5	147553094	147555199	DEL	NA12005	2105	71
5	177157399	177198449	DEL	NA12005	41050	68
5	180374610	180433980	DEL	NA12005	59370	39
6	29837192	29921127	DEL	NA12005	83935	84
6	32497116	32571961	DEL	NA12005	74845	81
1	1567881	1683706	DUP	NA12005	115825	79
1	17195155	17262247	DUP	NA12005	67092	70
1	110186846	110259108	DUP	NA12005	72262	51
1	161409063	161646758	DUP	NA12005	237695	86
1	234744318	234747260	DUP	NA12005	2942	83
10	26345494	26361303	DUP	NA12005	15809	68
10	46478317	47429141	DUP	NA12005	950824	86
10	47746303	47792421	DUP	NA12005	46118	83
10	48105747	48280150	DUP	NA12005	174403	79
10	89149588	89275944	DUP	NA12005	126356	86
10	92617266	92618168	DUP	NA12005	902	90
11	18949072	18961988	DUP	NA12005	12916	48
12	10566089	10603748	DUP	NA12005	37659	85
12	71532675	71533665	DUP	NA12005	990	54
12	106640836	106642276	DUP	NA12005	1440	3
12	124496106	124499990	DUP	NA12005	3884	11
14	73994388	74051967	DUP	NA12005	57579	52
15	22302006	22588022	DUP	NA12005	286016	62
15	30440575	30794939	DUP	NA12005	354364	84
15	32444256	32681359	DUP	NA12005	237103	80
15	34660520	34875351	DUP	NA12005	214831	83
15	99190120	99193816	DUP	NA12005	3696	85
16	222083	227514	DUP	NA12005	5431	84
16	2649818	2736115	DUP	NA12005	86297	87
16	14989863	15108587	DUP	NA12005	118724	77
16	21733697	21809459	DUP	NA12005	75762	82
16	28679547	28763122	DUP	NA12005	83575	84
16	55842382	55862710	DUP	NA12005	20328	28
16	74396294	74452036	DUP	NA12005	55742	49
17	44165801	44364214	DUP	NA12005	198413	26
19	41337301	41393256	DUP	NA12005	55955	68
19	54723919	54749032	DUP	NA12005	25113	84
2	38955866	38972830	DUP	NA12005	16964	6
20	1552338	1596222	DUP	NA12005	43884	51
20	56283924	56285426	DUP	NA12005	1502	82
21	10736871	10943554	DUP	NA12005	206683	82
22	24274694	24393721	DUP	NA12005	119027	61
4	76948569	76977780	DUP	NA12005	29211	41
5	180041765	180045486	DUP	NA12005	3721	3
6	255650	384973	DUP	NA12005	129323	86
6	29653954	29928841	DUP	NA12005	274887	84
6	31280101	31341340	DUP	NA12005	61239	66
6	32411907	32779836	DUP	NA12005	367929	35
6	62178788	62919415	DUP	NA12005	740627	67
7	56087431	56089032	DUP	NA12005	1601	63
7	76060899	76144728	DUP	NA12005	83829	2
7	76179714	76565750	DUP	NA12005	386036	9
7	126514673	126552956	DUP	NA12005	38283	78
7	143218968	143568059	DUP	NA12005	349091	86
8	7342641	7355399	DUP	NA12005	12758	76
1	1627918	1672603	DEL	NA12006	44685	13
1	25589146	25662212	DEL	NA12006	73066	37
1	89476419	89478526	DEL	NA12006	2107	29
1	110224384	110242953	DEL	NA12006	18569	89
1	116135317	116677627	DEL	NA12006	542310	46
1	152555176	152590091	DEL	NA12006	34915	62
1	152760089	152771114	DEL	NA12006	11025	32
1	169059628	169621268	DEL	NA12006	561640	25
1	196723047	196815791	DEL	NA12006	92744	41
10	89148493	89276558	DEL	NA12006	128065	13
11	48327672	48328178	DEL	NA12006	506	7
11	55364677	55453061	DEL	NA12006	88384	38
12	53086387	53087927	DEL	NA12006	1540	6
14	73998976	74028117	DEL	NA12006	29141	66
17	18355392	18465221	DEL	NA12006	109829	45
19	51509454	51511116	DEL	NA12006	1662	2
19	52692555	52696215	DEL	NA12006	3660	87
22	24283016	24340785	DEL	NA12006	57769	89
22	38956160	38964907	DEL	NA12006	8747	1
22	39355807	39392500	DEL	NA12006	36693	19
3	97887491	97919363	DEL	NA12006	31872	78
5	147553094	147555199	DEL	NA12006	2105	71
5	177157399	177198449	DEL	NA12006	41050	68
5	180374610	180433980	DEL	NA12006	59370	39
6	29837192	29921127	DEL	NA12006	83935	84
6	31280101	31341340	DEL	NA12006	61239	66
6	32431552	32573771	DEL	NA12006	142219	83
6	32609298	32632000	DEL	NA12006	22702	72
7	157338367	157350840	DEL	NA12006	12473	46
1	17195155	17267496	DUP	NA12006	72341	68
1	110215012	110244931	DUP	NA12006	29919	43
1	120755686	120936665	DUP	NA12006	180979	82
1	161409063	161646758	DUP	NA12006	237695	86
1	234744318	234747260	DUP	NA12006	2942	83
10	46478317	47429141	DUP	NA12006	950824	86
10	47746303	47792421	DUP	NA12006	46118	83
10	48105747	48280150	DUP	NA12006	174403	79
10	89149588	89275944	DUP	NA12006	126356	86
10	92617266	92618168	DUP	NA12006	902	90
11	55028247	55038507	DUP	NA12006	10260	78
12	10566089	10603748	DUP	NA12006	37659	85
12	71532675	71533665	DUP	NA12006	990	54
14	20177210	20424753	DUP	NA12006	247543	59
14	73994388	74051967	DUP	NA12006	57579	52
15	22302006	22588022	DUP	NA12006	286016	62
15	30440575	30794939	DUP	NA12006	354364	84
15	32444256	32681359	DUP	NA12006	237103	80
15	34660520	34875351	DUP	NA12006	214831	83
15	99190120	99193816	DUP	NA12006	3696	85
15	102359357	102401216	DUP	NA12006	41859	1
16	222083	227514	DUP	NA12006	5431	84
16	2649818	2741812	DUP	NA12006	91994	50
16	14989863	15108587	DUP	NA12006	118724	77
16	21733697	21809459	DUP	NA12006	75762	82
16	28679547	28763122	DUP	NA12006	83575	84
16	70847248	71202529	DUP	NA12006	355281	85
16	74396294	74452036	DUP	NA12006	55742	49
17	39532301	39539624	DUP	NA12006	7323	87
17	44165801	44364214	DUP	NA12006	198413	25
17	44401067	44752300	DUP	NA12006	351233	59
19	41337301	41393256	DUP	NA12006	55955	68
19	43308866	43547145	DUP	NA12006	238279	85
19	52131804	52150223	DUP	NA12006	18419	81
19	53322989	53361358	DUP	NA12006	38369	82
19	54723919	54749032	DUP	NA12006	25113	84
2	179296203	179296985	DUP	NA12006	782	36
20	1552338	1596222	DUP	NA12006	43884	51
20	56283924	56285426	DUP	NA12006	1502	82
21	10736871	10943554	DUP	NA12006	206683	82
22	18810110	19006124	DUP	NA12006	196014	2
22	24274694	24393721	DUP	NA12006	119027	61
22	42879201	43005214	DUP	NA12006	126013	87
3	194384096	194400303	DUP	NA12006	16207	45
4	76948569	76977780	DUP	NA12006	29211	41
5	69283618	69338235	DUP	NA12006	54617	76
6	255650	384973	DUP	NA12006	129323	82
6	29653954	29928841	DUP	NA12006	274887	84
6	31958876	31985522	DUP	NA12006	26646	81
6	32411907	32779836	DUP	NA12006	367929	35
6	46795547	46831976	DUP	NA12006	36429	21
7	126514673	126552956	DUP	NA12006	38283	78
7	143218968	143568059	DUP	NA12006	349091	86
7	151901841	151908834	DUP	NA12006	6993	80
8	7342641	7355399	DUP	NA12006	12758	76
1	25589146	25662212	DEL	NA12043	73066	37
1	110224384	110242953	DEL	NA12043	18569	89
11	4966925	4977889	DEL	NA12043	10964	58
11	55364677	55453061	DEL	NA12043	88384	38
14	20200183	20423865	DEL	NA12043	223682	82
17	18355392	18465221	DEL	NA12043	109829	45
19	52131804	52150223	DEL	NA12043	18419	81
19	52692555	52696215	DEL	NA12043	3660	87
22	24283016	24340785	DEL	NA12043	57769	89
22	24344422	24396814	DEL	NA12043	52392	69
22	33780263	33783473	DEL	NA12043	3210	7
3	97887491	97919363	DEL	NA12043	31872	78
4	69360488	69542499	DEL	NA12043	182011	49
5	147553094	147555199	DEL	NA12043	2105	71
5	177157399	177198449	DEL	NA12043	41050	68
6	29837192	29921127	DEL	NA12043	83935	84
6	31280101	31341340	DEL	NA12043	61239	66
6	32431552	32573771	DEL	NA12043	142219	84
6	32609298	32632000	DEL	NA12043	22702	72
7	157338367	157350840	DEL	NA12043	12473	46
1	1567881	1683706	DUP	NA12043	115825	79
1	25585225	25665195	DUP	NA12043	79970	81
1	120755686	120936665	DUP	NA12043	180979	82
1	161409063	161646758	DUP	NA12043	237695	86
1	234744318	234747260	DUP	NA12043	2942	83
10	26345494	26361303	DUP	NA12043	15809	68
10	33189319	33190528	DUP	NA12043	1209	70
10	46478317	47429141	DUP	NA12043	950824	86
10	47746303	47792421	DUP	NA12043	46118	83
10	48105747	48280150	DUP	NA12043	174403	79
10	89149588	89275944	DUP	NA12043	126356	86
10	92617266	92618168	DUP	NA12043	902	90
11	18949072	18961988	DUP	NA12043	12916	48
11	55028247	55038507	DUP	NA12043	10260	78
12	10566089	10603748	DUP	NA12043	37659	85
12	71532675	71533665	DUP	NA12043	990	54
14	20177210	20424753	DUP	NA12043	247543	48
14	73994388	74051967	DUP	NA12043	57579	52
15	22302006	22588022	DUP	NA12043	286016	62
15	30440575	30794939	DUP	NA12043	354364	84
15	32444256	32681359	DUP	NA12043	237103	80
15	34660520	34875351	DUP	NA12043	214831	83
15	99190120	99193816	DUP	NA12043	3696	85
16	222083	227514	DUP	NA12043	5431	84
16	2649818	2736115	DUP	NA12043	86297	87
16	14989863	15108587	DUP	NA12043	118724	77
16	21733697	21809459	DUP	NA12043	75762	82
16	70847248	71202529	DUP	NA12043	355281	85
17	39532301	39539624	DUP	NA12043	7323	87
17	44165801	44364214	DUP	NA12043	198413	25
19	41337301	41393256	DUP	NA12043	55955	68
19	42186492	42191707	DUP	NA12043	5215	1
19	43308866	43547145	DUP	NA12043	238279	85
19	53322989	53361358	DUP	NA12043	38369	82
19	54723919	54749032	DUP	NA12043	25113	84
2	179296203	179296985	DUP	NA12043	782	36
20	1552338	1596222	DUP	NA12043	43884	51
20	56283924	56285426	DUP	NA12043	1502	82
21	10736871	10943554	DUP	NA12043	206683	82
22	21725998	21845294	DUP	NA12043	119296	35
22	42879201	43005214	DUP	NA12043	126013	57
4	76948569	76977780	DUP	NA12043	29211	41
5	69283618	69338235	DUP	NA12043	54617	76
6	255650	384973	DUP	NA12043	129323	82
6	29653954	29928841	DUP	NA12043	274887	84
6	31958876	31985522	DUP	NA12043	26646	81
6	46795547	46831976	DUP	NA12043	36429	21
7	126514673	126552956	DUP	NA12043	38283	78
7	143218968	143568059	DUP	NA12043	349091	86
7	151901841	151908834	DUP	NA12043	6993	80
8	7342641	7355399	DUP	NA12043	12758	76
1	6438194	6445835	DEL	NA12044	7641	3
1	12841928	12971833	DEL	NA12044	129905	11
1	12909237	12927107	DEL	NA12044	17870	20
1	25589146	25662212	DEL	NA12044	73066	37
1	89476419	89478526	DEL	NA12044	2107	29
1	110224384	110242953	DEL	NA12044	18569	89
1	112692629	113246263	DEL	NA12044	553634	9
1	116135317	116677627	DEL	NA12044	542310	46
1	149622963	149801822	DEL	NA12044	178859	17
1	152555176	152590091	DEL	NA12044	34915	62
1	169059628	169621268	DEL	NA12044	561640	25
1	196723047	196815791	DEL	NA12044	92744	41
10	89148493	89276558	DEL	NA12044	128065	13
11	4966925	4977889	DEL	NA12044	10964	58
11	54965608	55036472	DEL	NA12044	70864	26
12	10583367	10596119	DEL	NA12044	12752	27
12	11504579	11568972	DEL	NA12044	64393	19
14	20200183	20423865	DEL	NA12044	223682	82
19	52692555	52696215	DEL	NA12044	3660	87
19	54800397	54811362	DEL	NA12044	10965	37
22	24344422	24396814	DEL	NA12044	52392	69
3	97887491	97919363	DEL	NA12044	31872	78
5	42628248	42631270	DEL	NA12044	3022	44
5	177157399	177198449	DEL	NA12044	41050	68
6	29837192	29921127	DEL	NA12044	83935	84
6	32431552	32573771	DEL	NA12044	142219	83
1	1567881	1683706	DUP	NA12044	115825	79
1	17195155	17267496	DUP	NA12044	72341	68
1	25585225	25665195	DUP	NA12044	79970	81
1	110186846	110259108	DUP	NA12044	72262	51
1	120755686	120936665	DUP	NA12044	180979	82
1	161409063	161646758	DUP	NA12044	237695	86
10	26345494	26361303	DUP	NA12044	15809	68
10	33189319	33190528	DUP	NA12044	1209	70
10	46478317	47429141	DUP	NA12044	950824	86
10	47746303	47792421	DUP	NA12044	46118	83
10	48105747	48280150	DUP	NA12044	174403	79
10	89149588	89275944	DUP	NA12044	126356	86
10	92617266	92618168	DUP	NA12044	902	90
11	18949072	18961988	DUP	NA12044	12916	48
11	55028247	55038507	DUP	NA12044	10260	78
12	10566089	10603748	DUP	NA12044	37659	85
12	71532675	71533665	DUP	NA12044	990	54
14	73994388	74051967	DUP	NA12044	57579	52
15	22302006	22588022	DUP	NA12044	286016	62
15	30440575	30794939	DUP	NA12044	354364	84
15	32444256	32681359	DUP	NA12044	237103	80
15	34660520	34875351	DUP	NA12044	214831	83
15	94886323	94888595	DUP	NA12044	2272	24
15	99190120	99193816	DUP	NA12044	3696	85
16	222083	227514	DUP	NA12044	5431	84
16	2679668	2741812	DUP	NA12044	62144	14
16	14989863	15108587	DUP	NA12044	118724	77
16	21733697	21809459	DUP	NA12044	75762	82
16	28679547	28763122	DUP	NA12044	83575	84
16	55842125	55865379	DUP	NA12044	23254	26
16	70847248	71202529	DUP	NA12044	355281	85
16	74396294	74452036	DUP	NA12044	55742	49
17	39532301	39539624	DUP	NA12044	7323	87
17	44165801	44364214	DUP	NA12044	198413	25
19	12500000	12550775	DUP	NA12044	50775	3
19	41337301	41393256	DUP	NA12044	55955	68
19	43308866	43547145	DUP	NA12044	238279	85
19	52131804	52150223	DUP	NA12044	18419	81
19	53322989	53361358	DUP	NA12044	38369	82
19	54723919	54749032	DUP	NA12044	25113	84
20	1556955	1561014	DUP	NA12044	4059	88
20	56283924	56285426	DUP	NA12044	1502	82
21	10736871	10943554	DUP	NA12044	206683	82
22	24283016	24340785	DUP	NA12044	57769	89
22	42879201	43005214	DUP	NA12044	126013	57
3	194384096	194400303	DUP	NA12044	16207	45
4	76948569	76977780	DUP	NA12044	29211	41
5	69283618	69338235	DUP	NA12044	54617	76
6	255650	384973	DUP	NA12044	129323	82
6	29653954	29928841	DUP	NA12044	274887	84
6	31280101	31341340	DUP	NA12044	61239	66
6	31958876	31985522	DUP	NA12044	26646	81
6	32411907	32779836	DUP	NA12044	367929	27
6	62178788	62919415	DUP	NA12044	740627	67
7	126514673	126552956	DUP	NA12044	38283	78
7	143218968	143568059	DUP	NA12044	349091	86
7	151901841	151908834	DUP	NA12044	6993	80
8	7342641	7355399	DUP	NA12044	12758	76
1	1627918	1672603	DEL	NA12144	44685	13
1	25589146	25662212	DEL	NA12144	73066	37
1	89476419	89478526	DEL	NA12144	2107	29
1	110186846	110259108	DEL	NA12144	72262	74
1	116135317	116677627	DEL	NA12144	542310	46
1	152555176	152590091	DEL	NA12144	34915	62
1	152760089	152771114	DEL	NA12144	11025	32
1	196723047	196815791	DEL	NA12144	92744	41
11	4966925	4977889	DEL	NA12144	10964	58
11	5784859	5809477	DEL	NA12144	24618	34
11	7812858	7841583	DEL	NA12144	28725	19
14	20200183	20423865	DEL	NA12144	223682	82
14	73998976	74028117	DEL	NA12144	29141	66
17	44401067	44752300	DEL	NA12144	351233	59
19	35849254	35865601	DEL	NA12144	16347	27
19	52692555	52696215	DEL	NA12144	3660	87
19	54800397	54811362	DEL	NA12144	10965	37
22	24283016	24340785	DEL	NA12144	57769	89
22	33780263	33783473	DEL	NA12144	3210	7
3	97887491	97919363	DEL	NA12144	31872	78
3	178550206	178568168	DEL	NA12144	17962	41
5	42628248	42631270	DEL	NA12144	3022	44
5	180374610	180433980	DEL	NA12144	59370	39
6	29837192	29921127	DEL	NA12144	83935	84
6	32431552	32573771	DEL	NA12144	142219	83
6	32609298	32632000	DEL	NA12144	22702	72
9	91963403	92343382	DEL	NA12144	379979	15
1	16368131	16379331	DUP	NA12144	11200	3
1	17195155	17267496	DUP	NA12144	72341	68
1	25585225	25665195	DUP	NA12144	79970	81
1	120755686	120936665	DUP	NA12144	180979	82
1	161409063	161646758	DUP	NA12144	237695	86
1	234744318	234747260	DUP	NA12144	2942	83
10	26345494	26361303	DUP	NA12144	15809	68
10	46478317	47429141	DUP	NA12144	950824	86
10	47746303	47792421	DUP	NA12144	46118	83
10	48105747	48280150	DUP	NA12144	174403	79
10	89149588	89275944	DUP	NA12144	126356	86
10	92617266	92618168	DUP	NA12144	902	90
11	18949072	18961988	DUP	NA12144	12916	48
11	55028247	55038507	DUP	NA12144	10260	78
12	10566089	10603748	DUP	NA12144	37659	85
12	71532675	71533665	DUP	NA12144	990	54
14	73994388	74051967	DUP	NA12144	57579	52
15	22302006	22588022	DUP	NA12144	286016	62
15	30440575	30794939	DUP	NA12144	354364	84
15	32444256	32681359	DUP	NA12144	237103	80
15	34660520	34875351	DUP	NA12144	214831	83
15	99190120	99193816	DUP	NA12144	3696	85
16	222083	227514	DUP	NA12144	5431	84
16	2649818	2741812	DUP	NA12144	91994	50
16	14989863	15108587	DUP	NA12144	118724	77
16	21733697	21809459	DUP	NA12144	75762	82
16	28679547	28763122	DUP	NA12144	83575	84
16	70847248	71202529	DUP	NA12144	355281	85
16	74396294	74452036	DUP	NA12144	55742	49
17	39532301	39539624	DUP	NA12144	7323	47
17	44165801	44364214	DUP	NA12144	198413	25
19	41337301	41393256	DUP	NA12144	55955	68
19	43308866	43547145	DUP	NA12144	238279	85
19	52131804	52150223	DUP	NA12144	18419	81
19	53322989	53361358	DUP	NA12144	38369	82
19	54723919	54749032	DUP	NA12144	25113	84
2	179296203	179296985	DUP	NA12144	782	36
20	1556955	1561014	DUP	NA12144	4059	88
20	56283924	56285426	DUP	NA12144	1502	82
21	10736871	10943554	DUP	NA12144	206683	82
21	44822523	44838545	DUP	NA12144	16022	3
22	21725998	21845294	DUP	NA12144	119296	35
22	24274694	24393721	DUP	NA12144	119027	61
22	42879201	43005214	DUP	NA12144	126013	57
4	76948569	76977780	DUP	NA12144	29211	41
5	69283618	69338235	DUP	NA12144	54617	76
6	255650	384973	DUP	NA12144	129323	82
6	29653954	29928841	DUP	NA12144	274887	84
6	31280101	31341340	DUP	NA12144	61239	66
6	31958876	31985522	DUP	NA12144	26646	81
6	62178788	62919415	DUP	NA12144	740627	67
7	56087431	56089032	DUP	NA12144	1601	63
7	126514673	126552956	DUP	NA12144	38283	78
7	143218968	143568059	DUP	NA12144	349091	86
7	151901841	151908834	DUP	NA12144	6993	80
8	7342641	7355399	DUP	NA12144	12758	76
1	25589146	25662212	DEL	NA12154	73066	37
1	89476419	89478526	DEL	NA12154	2107	29
1	108733355	108737496	DEL	NA12154	4141	36
1	110224384	110242953	DEL	NA12154	18569	89
1	116135317	116677627	DEL	NA12154	542310	46
1	149622963	149801822	DEL	NA12154	178859	17
1	169059628	169621268	DEL	NA12154	561640	25
10	89148493	89276558	DEL	NA12154	128065	13
10	96856006	96996043	DEL	NA12154	140037	24
11	4966925	4977889	DEL	NA12154	10964	58
12	10583367	10596119	DEL	NA12154	12752	27
14	73998976	74028117	DEL	NA12154	29141	66
17	39384376	39393765	DEL	NA12154	9389	14
17	44401067	44752300	DEL	NA12154	351233	59
19	35849254	35865601	DEL	NA12154	16347	27
19	52131804	52150223	DEL	NA12154	18419	81
19	52692555	52696215	DEL	NA12154	3660	87
22	24283016	24340785	DEL	NA12154	57769	89
22	39355807	39392500	DEL	NA12154	36693	19
3	97887491	97919363	DEL	NA12154	31872	78
4	69360488	69542499	DEL	NA12154	182011	49
5	21916844	22017389	DEL	NA12154	100545	1
5	42628248	42631270	DEL	NA12154	3022	44
5	69194688	69411939	DEL	NA12154	217251	3
5	147553094	147555199	DEL	NA12154	2105	71
5	177157399	177198449	DEL	NA12154	41050	68
6	29837192	29921127	DEL	NA12154	83935	84
6	32431552	32573771	DEL	NA12154	142219	83
6	32609298	32632000	DEL	NA12154	22702	72
7	66621964	66676630	DEL	NA12154	54666	36
7	157338367	157350840	DEL	NA12154	12473	46
1	1567881	1683706	DUP	NA12154	115825	79
1	17195155	17267496	DUP	NA12154	72341	68
1	25585225	25665195	DUP	NA12154	79970	81
1	110215012	110244931	DUP	NA12154	29919	43
1	120755686	120936665	DUP	NA12154	180979	82
1	161409063	161646758	DUP	NA12154	237695	86
1	234744318	234747260	DUP	NA12154	2942	83
10	46478317	47429141	DUP	NA12154	950824	86
10	47746303	47792421	DUP	NA12154	46118	83
10	48105747	48280150	DUP	NA12154	174403	79
10	92617266	92618168	DUP	NA12154	902	90
11	18949072	18961988	DUP	NA12154	12916	48
11	55028247	55038507	DUP	NA12154	10260	78
12	10566089	10603748	DUP	NA12154	37659	85
12	71532675	71533665	DUP	NA12154	990	54
14	20200183	20423372	DUP	NA12154	223189	50
15	22302006	22588022	DUP	NA12154	286016	62
15	30440575	30794939	DUP	NA12154	354364	84
15	32444256	32509148	DUP	NA12154	64892	84
15	34660520	34875351	DUP	NA12154	214831	83
15	99190120	99193816	DUP	NA12154	3696	85
16	222083	227514	DUP	NA12154	5431	84
16	2649818	2736115	DUP	NA12154	86297	87
16	14989863	15108587	DUP	NA12154	118724	77
16	21733697	21809459	DUP	NA12154	75762	82
16	28679547	28763122	DUP	NA12154	83575	84
16	70847248	71202529	DUP	NA12154	355281	85
16	74396294	74452036	DUP	NA12154	55742	49
17	39532301	39539624	DUP	NA12154	7323	87
19	41337301	41393256	DUP	NA12154	55955	68
19	43308866	43547145	DUP	NA12154	238279	85
19	53322989	53361358	DUP	NA12154	38369	82
19	54723919	54749032	DUP	NA12154	25113	84
2	179296203	179296985	DUP	NA12154	782	36
2	228241147	228258857	DUP	NA12154	17710	7
20	1552338	1596222	DUP	NA12154	43884	51
20	56283924	56285426	DUP	NA12154	1502	82
21	10736871	10943554	DUP	NA12154	206683	82
22	24274694	24393721	DUP	NA12154	119027	61
22	42879201	43005214	DUP	NA12154	126013	57
4	76948569	76977780	DUP	NA12154	29211	41
6	255650	384973	DUP	NA12154	129323	86
6	29653954	29928841	DUP	NA12154	274887	84
6	31958876	31985522	DUP	NA12154	26646	81
7	56087431	56089032	DUP	NA12154	1601	63
7	126514673	126552956	DUP	NA12154	38283	78
7	143218968	143568059	DUP	NA12154	349091	86
7	151901841	151908834	DUP	NA12154	6993	80
1	108733355	108737496	DEL	NA12155	4141	36
1	110224384	110242953	DEL	NA12155	18569	89
1	116135317	116677627	DEL	NA12155	542310	46
1	152555176	152590091	DEL	NA12155	34915	62
1	152760089	152771114	DEL	NA12155	11025	32
1	196723047	196815791	DEL	NA12155	92744	41
11	5784859	5809477	DEL	NA12155	24618	34
14	20200183	20423865	DEL	NA12155	223682	82
14	73998976	74028117	DEL	NA12155	29141	66
19	43505920	43636036	DEL	NA12155	130116	1
19	43703033	43756237	DEL	NA12155	53204	29
19	52131804	52150223	DEL	NA12155	18419	81
19	52692555	52696215	DEL	NA12155	3660	87
22	24283016	24340785	DEL	NA12155	57769	89
3	97887491	97919363	DEL	NA12155	31872	78
4	69360488	69542499	DEL	NA12155	182011	49
5	69194688	69411939	DEL	NA12155	217251	3
5	147553094	147555199	DEL	NA12155	2105	71
5	177157399	177198449	DEL	NA12155	41050	68
5	180374610	180433980	DEL	NA12155	59370	39
6	29837192	29921127	DEL	NA12155	83935	84
6	32431552	32573771	DEL	NA12155	142219	83
6	32609298	32632000	DEL	NA12155	22702	72
6	169633222	169635277	DEL	NA12155	2055	3
7	157338367	157350840	DEL	NA12155	12473	46
1	1567881	1683706	DUP	NA12155	115825	79
1	25585225	25665195	DUP	NA12155	79970	81
1	104109238	104159384	DUP	NA12155	50146	11
1	120755686	120936665	DUP	NA12155	180979	82
1	161409063	161646758	DUP	NA12155	237695	86
1	234744318	234747260	DUP	NA12155	2942	83
10	26345494	26361303	DUP	NA12155	15809	68
10	33189319	33190528	DUP	NA12155	1209	70
10	46478317	47429141	DUP	NA12155	950824	86
10	47746303	47792421	DUP	NA12155	46118	83
10	89149588	89275944	DUP	NA12155	126356	86
10	92617266	92618168	DUP	NA12155	902	90
11	55028247	55038507	DUP	NA12155	10260	78
12	10566089	10603748	DUP	NA12155	37659	85
12	71532675	71533665	DUP	NA12155	990	54
14	73994388	74051967	DUP	NA12155	57579	52
14	99640536	99642292	DUP	NA12155	1756	1
15	22302006	22588022	DUP	NA12155	286016	62
15	30440575	30794939	DUP	NA12155	354364	84
15	32444256	32681359	DUP	NA12155	237103	80
15	34660520	34875351	DUP	NA12155	214831	83
15	99190120	99193816	DUP	NA12155	3696	85
16	222083	227514	DUP	NA12155	5431	84
16	2649818	2741812	DUP	NA12155	91994	50
16	14989863	15108587	DUP	NA12155	118724	77
16	21733697	21809459	DUP	NA12155	75762	82
16	28679547	28763122	DUP	NA12155	83575	84
16	55842125	55865379	DUP	NA12155	23254	26
16	70847248	71202529	DUP	NA12155	355281	85
17	39532301	39539624	DUP	NA12155	7323	87
17	44165801	44364214	DUP	NA12155	198413	25
19	41337301	41393256	DUP	NA12155	55955	68
19	43308866	43547145	DUP	NA12155	238279	85
19	53322989	53361358	DUP	NA12155	38369	82
19	54723919	54749032	DUP	NA12155	25113	84
2	179296203	179296985	DUP	NA12155	782	36
20	1556955	1561014	DUP	NA12155	4059	88
20	56283924	56285426	DUP	NA12155	1502	82
21	10736871	10943554	DUP	NA12155	206683	82
22	24274694	24393721	DUP	NA12155	119027	61
22	42879201	43005214	DUP	NA12155	126013	87
3	194384096	194400303	DUP	NA12155	16207	45
5	472279	473889	DUP	NA12155	1610	4
6	255650	384973	DUP	NA12155	129323	86
6	29653954	29928841	DUP	NA12155	274887	84
6	31958876	31985522	DUP	NA12155	26646	81
6	62178788	62919415	DUP	NA12155	740627	67
7	126514673	126552956	DUP	NA12155	38283	78
7	143218968	143568059	DUP	NA12155	349091	86
7	151901841	151908834	DUP	NA12155	6993	80
8	7342641	7355399	DUP	NA12155	12758	76
1	25589146	25662212	DEL	NA12156	73066	37
1	108733355	108737496	DEL	NA12156	4141	36
1	110224384	110242953	DEL	NA12156	18569	89
1	116135317	116677627	DEL	NA12156	542310	46
1	196723047	196815791	DEL	NA12156	92744	41
10	96856006	96996043	DEL	NA12156	140037	24
11	4966925	4977889	DEL	NA12156	10964	58
11	48327672	48328178	DEL	NA12156	506	7
12	11504579	11568972	DEL	NA12156	64393	19
14	20200183	20423865	DEL	NA12156	223682	82
17	18355392	18465221	DEL	NA12156	109829	45
19	52692555	52696215	DEL	NA12156	3660	87
19	54800397	54811362	DEL	NA12156	10965	37
22	22453535	22605345	DEL	NA12156	151810	9
22	24283016	24340785	DEL	NA12156	57769	89
3	97887491	97919363	DEL	NA12156	31872	78
4	69360488	69542499	DEL	NA12156	182011	49
5	147553094	147555199	DEL	NA12156	2105	71
5	180374610	180433980	DEL	NA12156	59370	39
6	29837192	29921127	DEL	NA12156	83935	84
6	32431552	32573771	DEL	NA12156	142219	83
6	32609298	32632000	DEL	NA12156	22702	72
6	169633222	169635277	DEL	NA12156	2055	3
7	6854110	6864083	DEL	NA12156	9973	27
7	66621964	66676630	DEL	NA12156	54666	36
7	143877544	143910356	DEL	NA12156	32812	4
1	1567881	1683706	DUP	NA12156	115825	79
1	110186846	110259108	DUP	NA12156	72262	60
1	120755686	120936665	DUP	NA12156	180979	82
1	161409063	161646758	DUP	NA12156	237695	86
1	234744318	234747260	DUP	NA12156	2942	83
10	26345494	26361303	DUP	NA12156	15809	68
10	33189319	33190528	DUP	NA12156	1209	70
10	46478317	47429141	DUP	NA12156	950824	86
10	47746303	47792421	DUP	NA12156	46118	83
10	48105747	48280150	DUP	NA12156	174403	79
10	89149588	89275944	DUP	NA12156	126356	86
10	92617266	92618168	DUP	NA12156	902	90
11	55028247	55038507	DUP	NA12156	10260	78
12	10566089	10603748	DUP	NA12156	37659	85
12	71532675	71533665	DUP	NA12156	990	54
14	65014784	65020415	DUP	NA12156	5631	2
14	73994388	74051967	DUP	NA12156	57579	52
14	93712512	93713151	DUP	NA12156	639	42
15	30440575	30794939	DUP	NA12156	354364	84
15	32444256	32681359	DUP	NA12156	237103	80
15	34660520	34875351	DUP	NA12156	214831	83
15	99190120	99193816	DUP	NA12156	3696	85
16	222083	227514	DUP	NA12156	5431	84
16	2649818	2736115	DUP	NA12156	86297	87
16	14989863	15108587	DUP	NA12156	118724	77
16	21733697	21809459	DUP	NA12156	75762	82
16	28679547	28763122	DUP	NA12156	83575	84
16	70847248	71202529	DUP	NA12156	355281	85
16	74396294	74452036	DUP	NA12156	55742	49
17	39532301	39539624	DUP	NA12156	7323	87
17	44165801	44364214	DUP	NA12156	198413	25
19	41337301	41393256	DUP	NA12156	55955	68
19	43308866	43547145	DUP	NA12156	238279	85
19	52131804	52150223	DUP	NA12156	18419	81
19	53322989	53361358	DUP	NA12156	38369	82
19	54723919	54749032	DUP	NA12156	25113	84
2	179296203	179296985	DUP	NA12156	782	36
20	1556955	1561014	DUP	NA12156	4059	88
20	56283924	56285426	DUP	NA12156	1502	82
21	10736871	10943554	DUP	NA12156	206683	82
22	24274694	24393721	DUP	NA12156	119027	61
22	42879201	43005214	DUP	NA12156	126013	87
5	69283618	69338235	DUP	NA12156	54617	76
6	255650	384973	DUP	NA12156	129323	82
6	29653954	29928841	DUP	NA12156	274887	84
6	31958876	31985522	DUP	NA12156	26646	81
6	32592985	32614037	DUP	NA12156	21052	43
6	46795547	46831976	DUP	NA12156	36429	21
7	56087431	56089032	DUP	NA12156	1601	63
7	126514673	126552956	DUP	NA12156	38283	78
7	143218968	143568059	DUP	NA12156	349091	86
7	151901841	151908834	DUP	NA12156	6993	80
8	7342641	7355399	DUP	NA12156	12758	76
8	57048637	57098534	DUP	NA12156	49897	1
1	25589146	25662212	DEL	NA12234	73066	37
1	89476419	89478526	DEL	NA12234	2107	29
1	108733355	108737496	DEL	NA12234	4141	36
1	110186846	110259108	DEL	NA12234	72262	74
1	152555176	152590091	DEL	NA12234	34915	62
1	152760089	152771114	DEL	NA12234	11025	32
1	169059628	169621268	DEL	NA12234	561640	25
1	196723047	196815791	DEL	NA12234	92744	41
1	213002088	213013140	DEL	NA12234	11052	6
1	248729106	248797213	DEL	NA12234	68107	34
11	4968113	4977082	DEL	NA12234	8969	59
11	5784859	5809477	DEL	NA12234	24618	34
11	55367889	55453009	DEL	NA12234	85120	38
14	20200183	20423865	DEL	NA12234	223682	82
14	73998976	74028117	DEL	NA12234	29141	66
17	18355392	18465221	DEL	NA12234	109829	45
17	44401067	44752300	DEL	NA12234	351233	59
19	35849493	35861848	DEL	NA12234	12355	31
19	46622580	46628261	DEL	NA12234	5681	10
20	1557219	1560562	DEL	NA12234	3343	13
22	24283016	24340785	DEL	NA12234	57769	89
22	24344422	24396814	DEL	NA12234	52392	69
3	73672992	73674813	DEL	NA12234	1821	1
4	69372327	69542499	DEL	NA12234	170172	51
5	147553094	147555199	DEL	NA12234	2105	71
5	180374610	180433980	DEL	NA12234	59370	39
6	29837192	29921127	DEL	NA12234	83935	84
6	32431552	32573771	DEL	NA12234	142219	83
6	32609298	32632000	DEL	NA12234	22702	72
7	66621964	66676630	DEL	NA12234	54666	36
7	157338367	157350840	DEL	NA12234	12473	46
1	1567881	1683706	DUP	NA12234	115825	79
1	17195155	17267496	DUP	NA12234	72341	68
1	25585225	25665195	DUP	NA12234	79970	81
1	120755686	120936665	DUP	NA12234	180979	82
1	161479945	161646758	DUP	NA12234	166813	88
1	234744318	234747260	DUP	NA12234	2942	83
10	26345494	26361303	DUP	NA12234	15809	68
10	33189319	33190528	DUP	NA12234	1209	70
10	46478317	47429141	DUP	NA12234	950824	86
10	47746303	47792421	DUP	NA12234	46118	83
10	48105747	48280150	DUP	NA12234	174403	79
10	89149588	89275944	DUP	NA12234	126356	86
10	92617266	92618168	DUP	NA12234	902	90
10	135237022	135400723	DUP	NA12234	163701	6
11	18949072	18961988	DUP	NA12234	12916	48
11	55028247	55038507	DUP	NA12234	10260	78
12	10566089	10603748	DUP	NA12234	37659	85
12	112035871	112037545	DUP	NA12234	1674	1
13	53419990	53422747	DUP	NA12234	2757	2
13	77459103	77460910	DUP	NA12234	1807	2
14	73994388	74051967	DUP	NA12234	57579	52
14	103988029	103989824	DUP	NA12234	1795	3
15	22302006	22588022	DUP	NA12234	286016	62
15	30440575	30794939	DUP	NA12234	354364	84
15	32444256	32681359	DUP	NA12234	237103	80
15	34660520	34875351	DUP	NA12234	214831	83
15	99190120	99193816	DUP	NA12234	3696	85
16	222083	227514	DUP	NA12234	5431	84
16	2649818	2736115	DUP	NA12234	86297	87
16	14989863	15108587	DUP	NA12234	118724	77
16	28679547	28763122	DUP	NA12234	83575	84
16	55842125	55865379	DUP	NA12234	23254	26
16	58059528	58061343	DUP	NA12234	1815	2
16	70847248	71202529	DUP	NA12234	355281	85
[truncated: 5,303 more rows]
